# Supplementary material
Source: PubMed Central journal article supplement (PMC4919588)
Supplement: mmc1.pdf [file mmc1.pdf]

**Biophysical Journal, Volume 110**

**Supplemental Information**

**BamA POTRA Domain Interacts with a Native Lipid Membrane Surface**

**Patrick J. Fleming, Dhillon S. Patel, Emilia L. Wu, Yifei Qi, Min Sun Yeom, Marcelo Carlos Sousa, Karen G. Fleming, and Wonpil Im**

## FIGURES

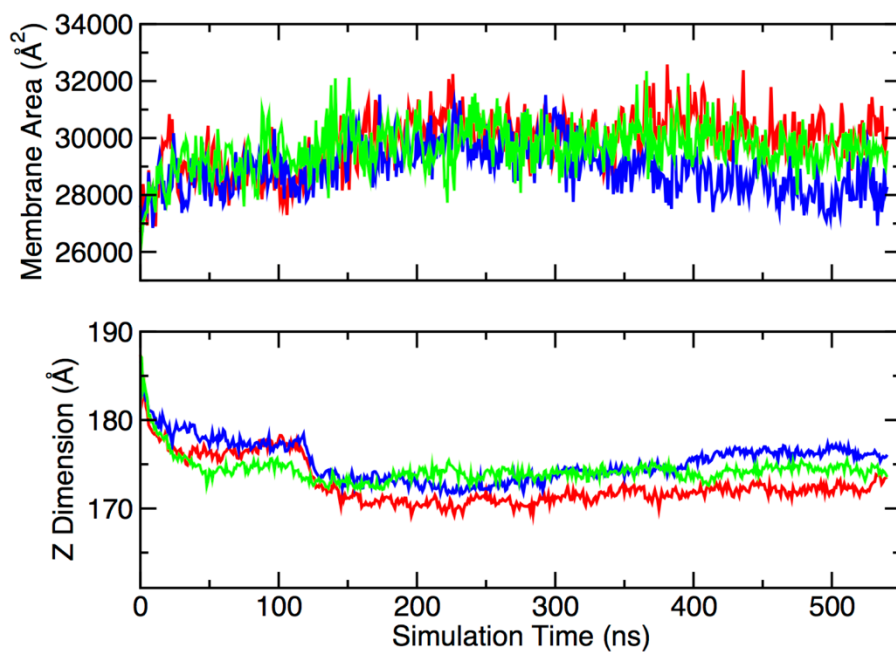

**Figure S1.** Time-series of the membrane surface areas and system z dimensions for three systems containing BamA in model *E. coli* membranes. Red, blue and green represent replicas 1, 2, 3, respectively.

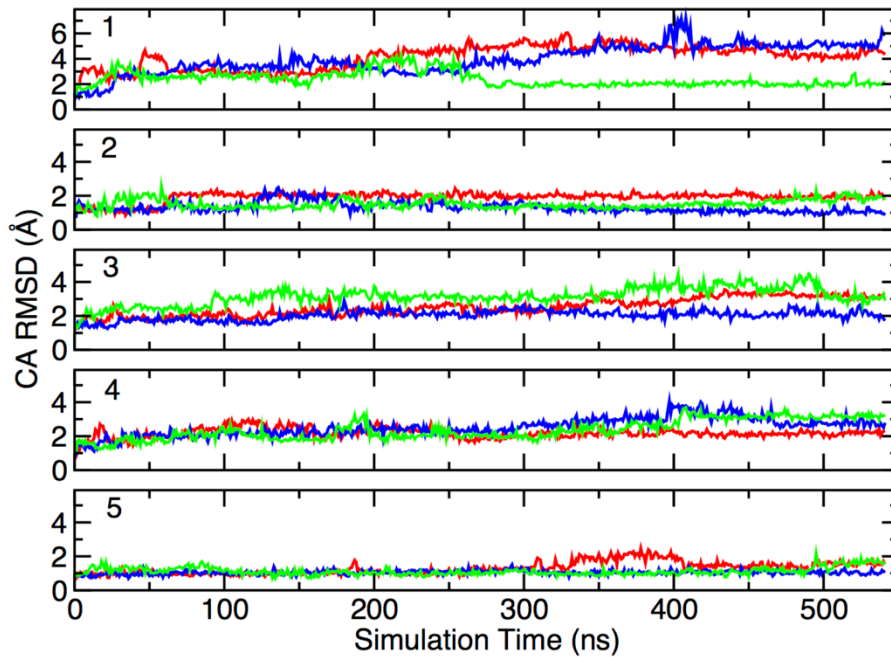

**Figure S2.** POTRA domains have variable backbone flexibility during MD simulation. The C $\alpha$  RMSD compared to crystal structures for POTRA domains 1-5 are plotted. The colors red, blue and green indicate replicas 1, 2 and 3, respectively.

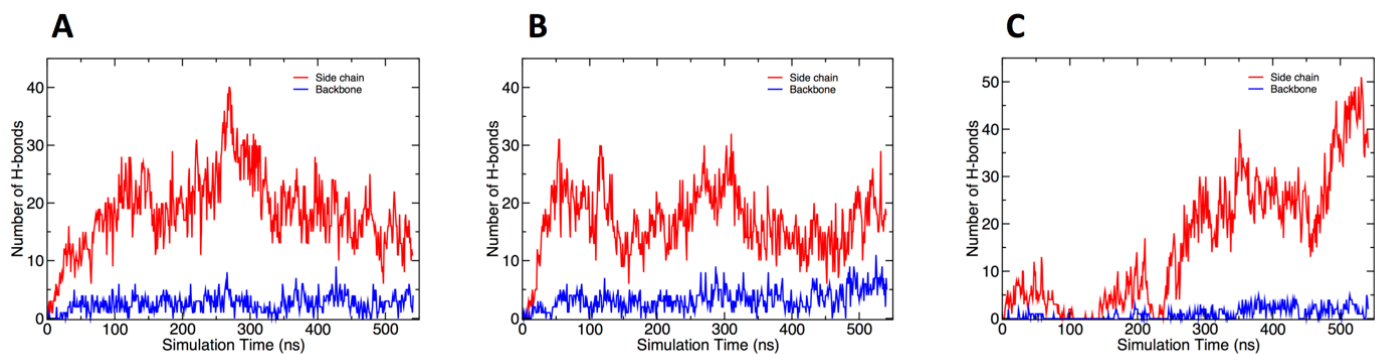

**Figure S3.** BamA POTRA domain forms many hydrogen bonds with phospholipid head groups. The total number of hydrogen bonds (heavy atom distance, 3.0 Å, maximum angle 45°) between POTRA1-4 and membrane phospholipids is plotted versus simulation time. Protein residue side chain (red) and backbone (blue) hydrogen bonds are plotted separately; data from replicas 1, 2, 3 are shown in plots A, B, C, respectively.

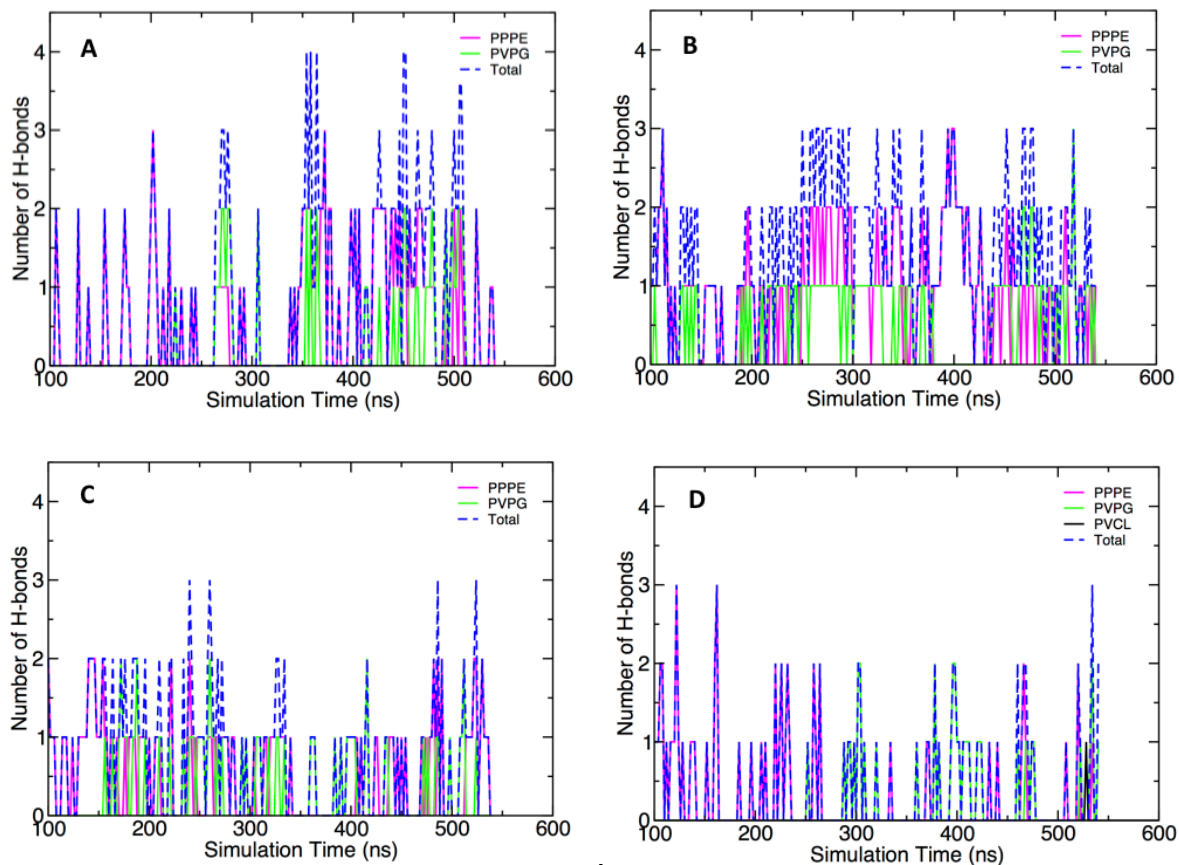

**Figure S4.** BamA hydrogen bonds to phospholipids with dynamic exchange of partners. Hydrogen bonding between amino acid side chains and phospholipids was measured using a distance cutoff of 3.0 Å, and maximum angle of 45° in full length BamA embedded in a model *E. coli* membrane. (A) BamA R64; (B) BamA K103; (C) BamA K106; (D) BamA R162. Data shown are for replica 1.

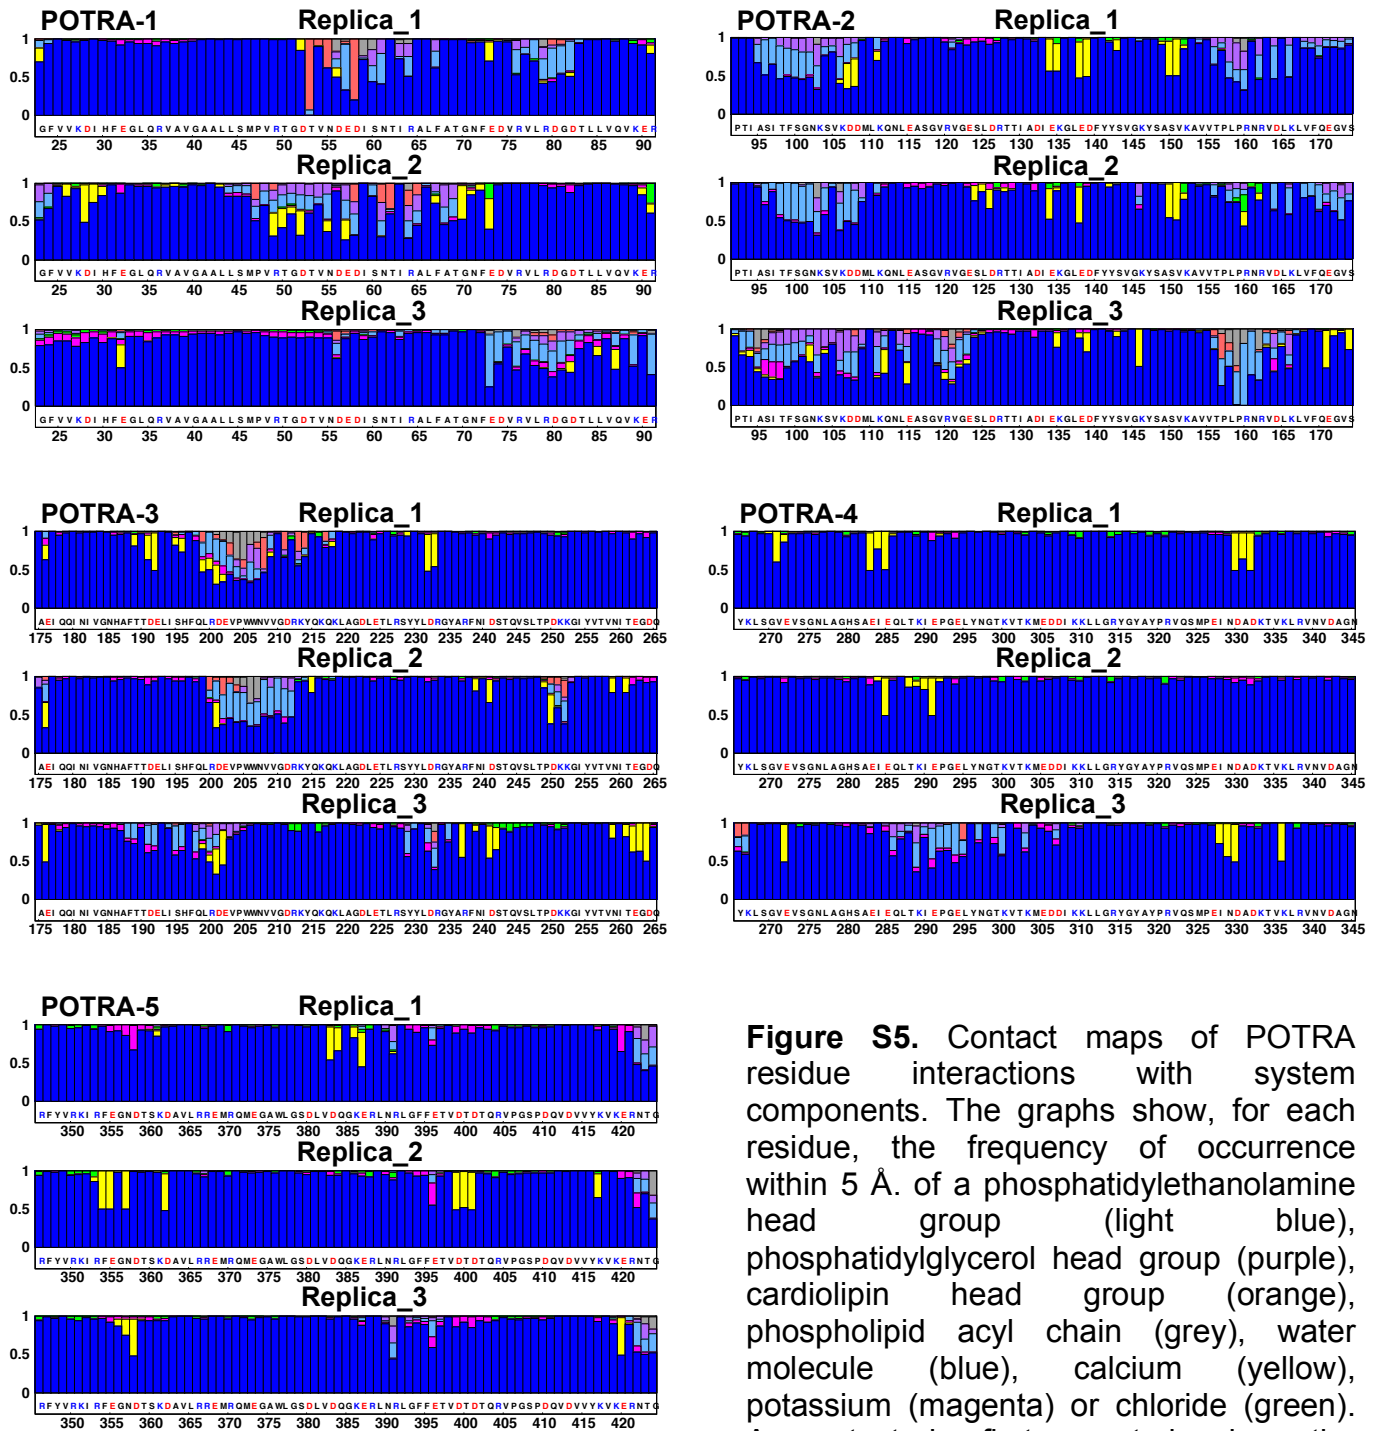

**Figure S5.** Contact maps of POTRA residue interactions with system components. The graphs show, for each residue, the frequency of occurrence within 5 Å. of a phosphatidylethanolamine head group (light blue), phosphatidylglycerol head group (purple), cardiolipin head group (orange), phospholipid acyl chain (grey), water molecule (blue), calcium (yellow), potassium (magenta) or chloride (green). A contact is first counted when the distance of between the heavy atoms of a residue and those of its interacting partner is <5 Å, and normalized for each interacting partner. The BamA amino acid sequence and residue number is below each pattern of interactions.

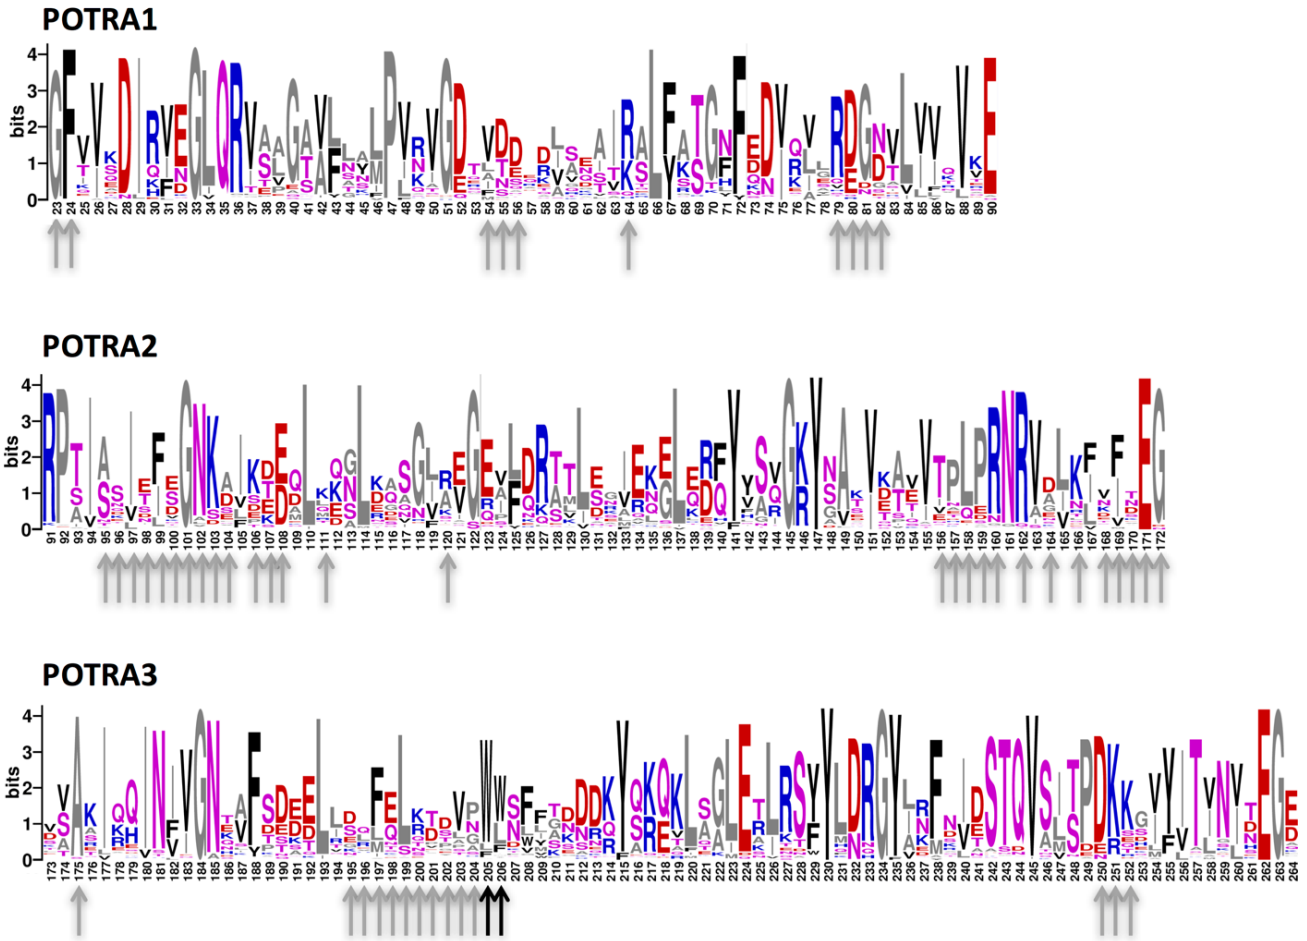

**Figure S6.** WebLogo diagram of POTRA1-3 consensus sequence. A multiple sequence alignment of 149 bacterial BamA homologs was used to generate the consensus sequence. POTRA1, 2 and 3 are shown in the top, middle, and bottom rows, respectively. Sites of significant interaction with the membrane are indicated with arrows (cf. Supp. Fig. S5); black arrows indicate conserved aromatic residues at positions 205 and 206 that insert into the membrane interfacial region.

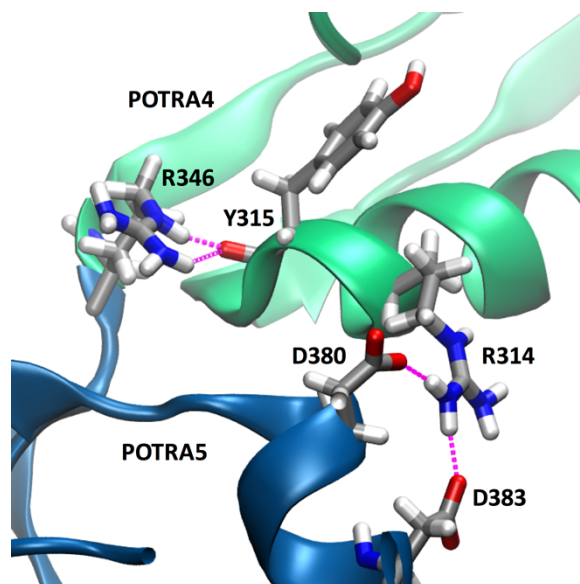

**Figure S7.** POTRA4-5 inter-motif orientation is stabilized during simulation by hydrogen bonds similar to those described for crystal structure 3OG5. Snapshot of POTRA3-4 linker region from replica 1 showing additional interaction between R314 and D380 that is occasionally observed. Compare to Figure 1 in [25].



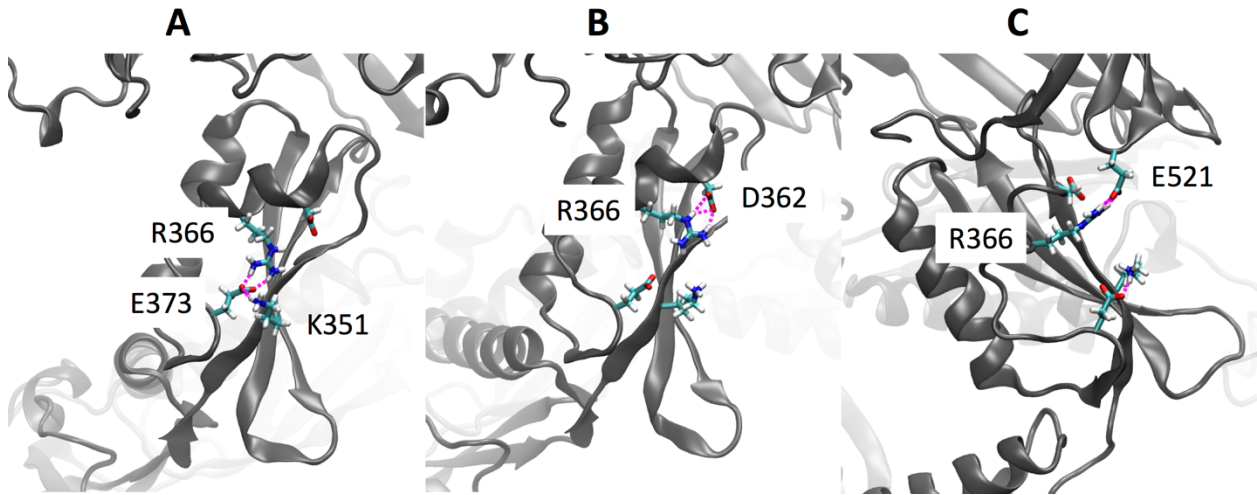

**Figure S8.** Residues in the POTRA5 core show conformational plasticity. Three separate snapshots (A,B,C) from trajectories of full length BamA embedded in a model *E. coli* membrane illustrating the dynamic electrostatic network between charged residues.

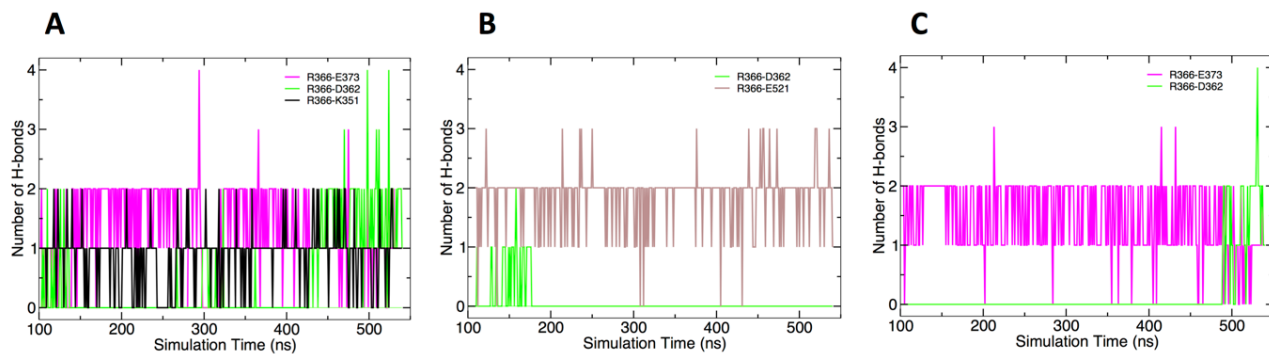

**Figure S9.** POTRA5 core residues exchange hydrogen bonding partners to create a dynamic electrostatic network. The number of, and partners for, R366 hydrogen bonding in full length BamA embedded in LPS/PL membranes are shown. (A), replica 1; (B), replica 2; (C), replica 3.

**Front view**

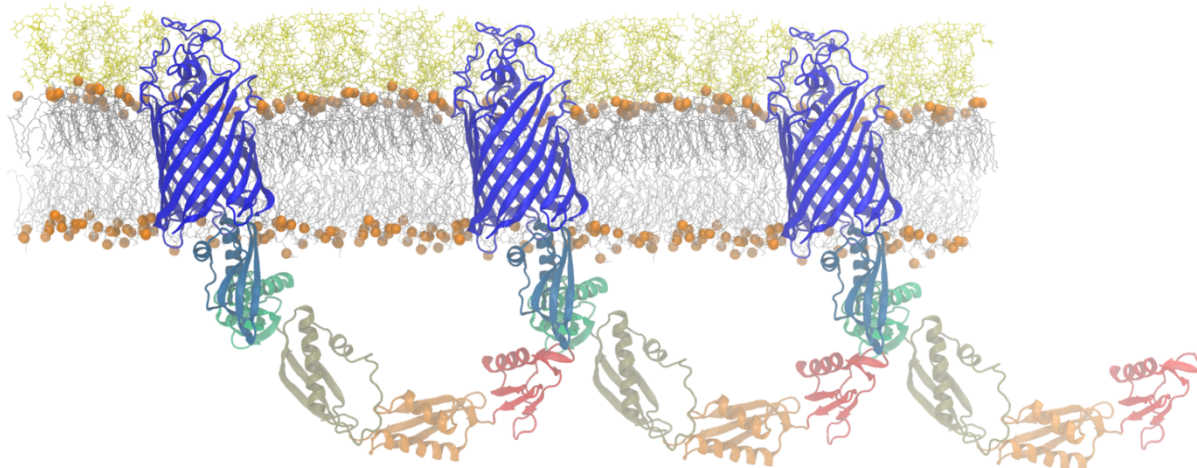

**Bottom view**

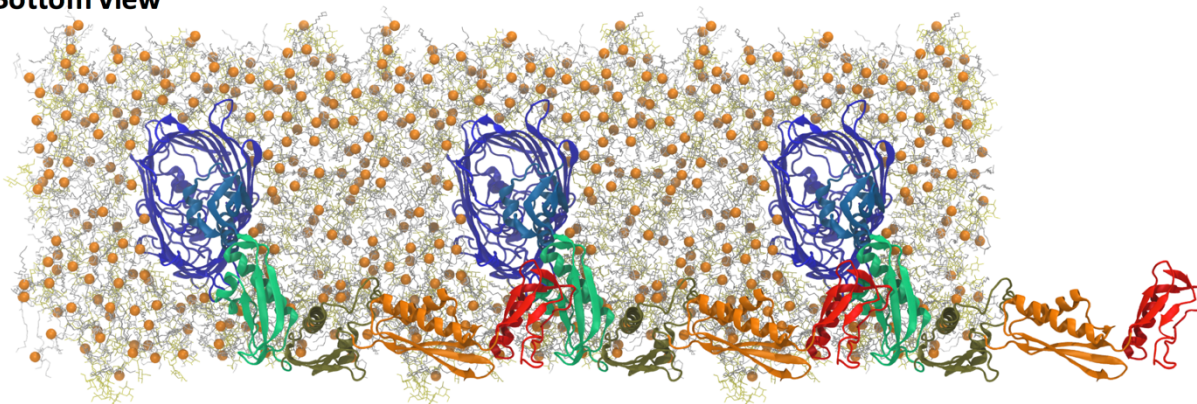

**Figure S10.** Periodic boundary image BamA contacts at small lipid to protein ratios. Two independent molecular systems with membrane surface dimensions of  $90\text{\AA} \times 90\text{\AA}$  (100 lower leaflet phospholipid:1 protein) were simulated with conventional MD. In both systems the periodic boundary protein neighbors made stable contact within 250 ns simulation time. Replica 2 shown.

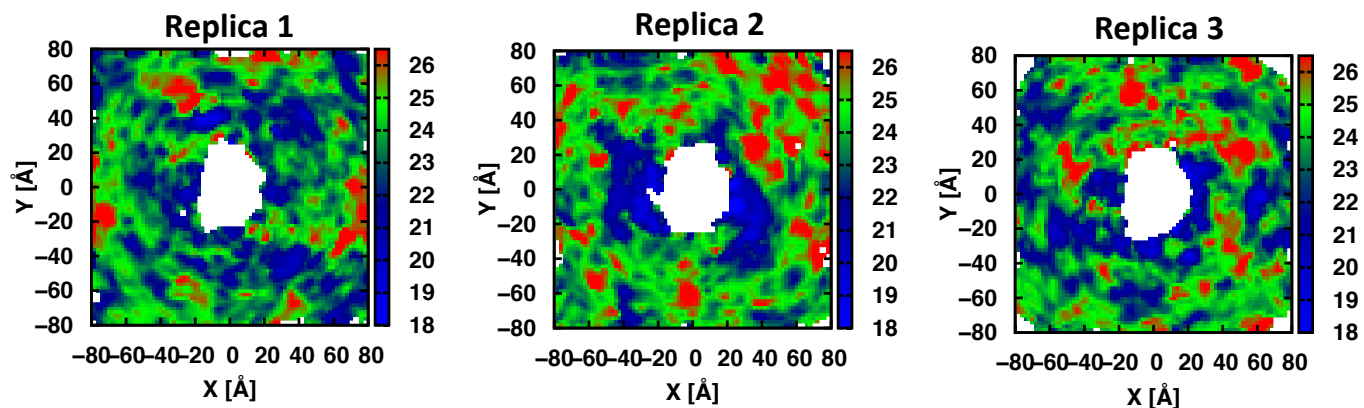

**Figure S11.** Two-dimensional z-thickness of the LPS/phospholipid membrane with embedded full-length BamA. Thickness is defined as the distance between the average of C2 and C4 atoms of lipid A (combined) and the average C2 positions of phospholipids within a 2 Å grid and represents the hydrophobic thickness. The relative orientation of the embedded BamA is the same as in Figure 6.

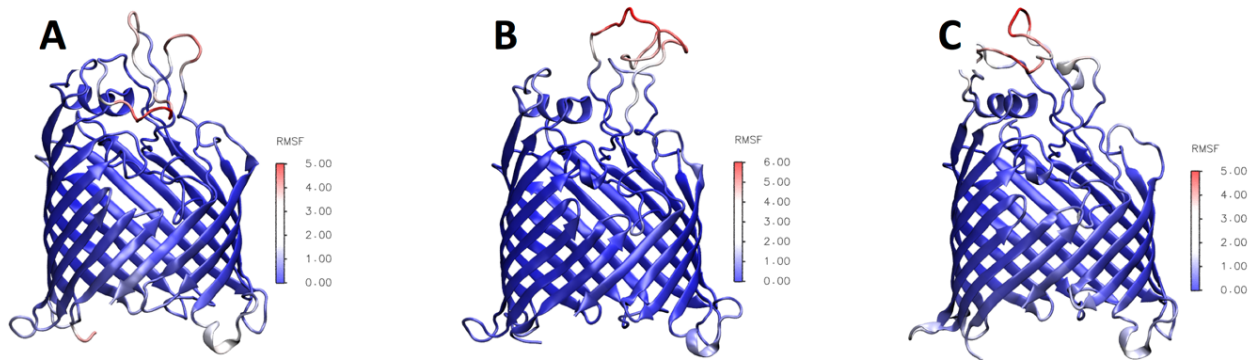

**Figure S12.** BamA  $\beta$ -barrel transmembrane strands have low RMSF in LPS/phospholipid membranes but extra-membranous loops and turns are variable. Ribbon diagrams of the  $\beta$ -barrel fragment are colored according to C $\alpha$  RMSF calculated from 100 -540 ns. (A) Strand C $\alpha$  RMSD to starting structure = 0.80 Å, total  $\beta$ -barrel C $\alpha$  RMSD = 2.41 Å; (B) Strand C $\alpha$  RMSD to starting structure = 0.93 Å, total  $\beta$ -barrel C $\alpha$  RMSD = 3.75 Å. (C) Strand C $\alpha$  RMSD to starting structure = 0.83 Å, total  $\beta$ -barrel C $\alpha$  RMSD = 2.63 Å.

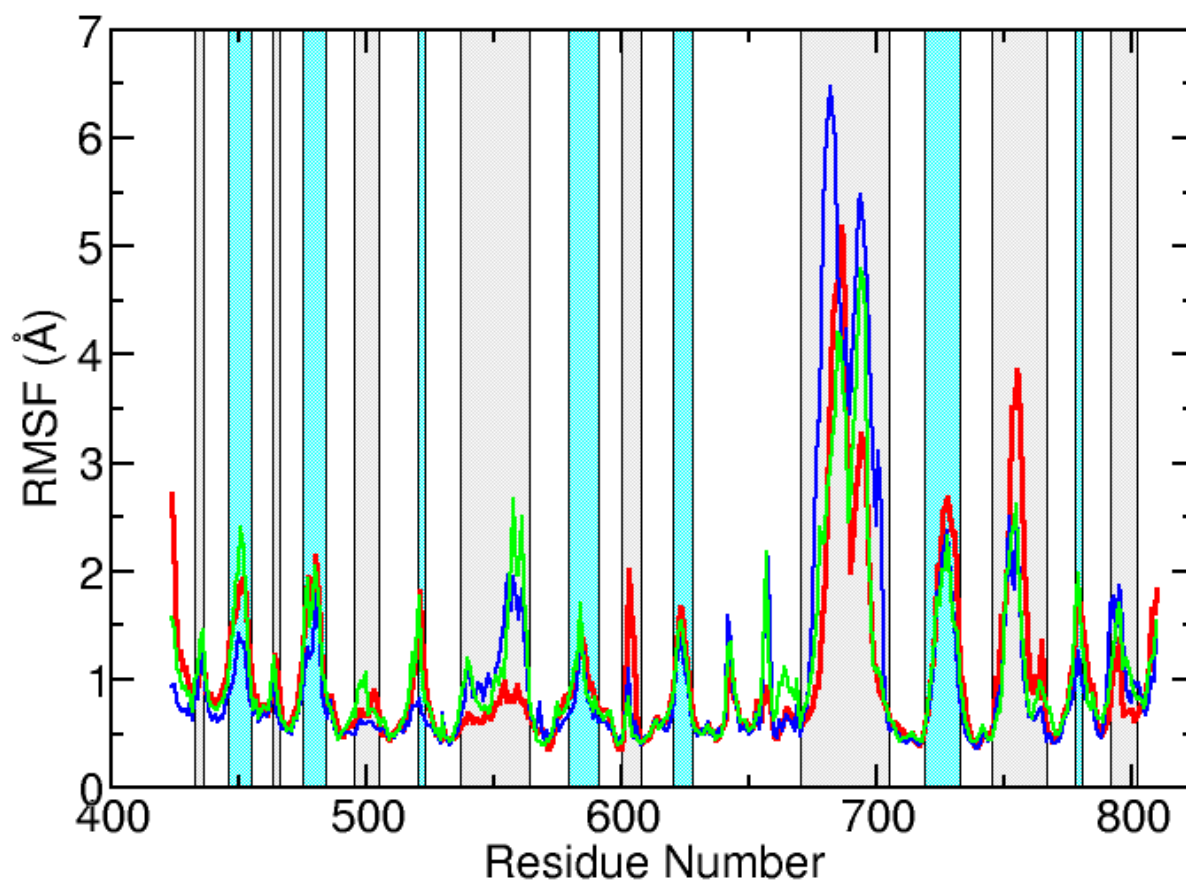

**Figure S13.** Root mean-square fluctuations (RMSF) of the BamA  $\beta$ -barrel  $C\alpha$  backbone atoms in replicas 1, 2, and 3 (red, blue, green curves) averaged over 540 ns. Protein structure is indicated by the colored bars: extracellular loops (grey) and periplasmic turns (cyan). The region between residues 640 and 709 includes the L6 loop that extends into the barrel cavity and continues into an external loop.

## Movie Legends

**Movie S1.** Replica 1 simulation. Full length BamA embedded in an LPS/phospholipid membrane; simulation time shown is 1-540 ns. Red = POTRA1, orange = POTRA2, khaki = POTRA3, green = POTRA4, light blue = POTRA5, dark blue =  $\beta$ -barrel. Membrane phosphates delimiting the hydrophobic core are shown as orange spheres; polysaccharide as dark yellow lines and other lipid as grey lines.

**Movie S2.** Replica 2 simulation. Full length BamA embedded in an LPS/phospholipid membrane; simulation time shown is 1-540 ns. Red = POTRA1, orange = POTRA2, khaki = POTRA3, green = POTRA4, light blue = POTRA5, dark blue =  $\beta$ -barrel. Membrane phosphates delimiting the hydrophobic core are shown as orange spheres; polysaccharide as dark yellow lines and other lipid as grey lines.

**Movie S3.** Replica 3 simulation. Full length BamA embedded in an LPS/phospholipid membrane; simulation time shown is 1-540 ns. The POTRA domains contact the membrane at approximately 230 ns of simulation. Red = POTRA1, orange = POTRA2, khaki = POTRA3, green = POTRA4, light blue = POTRA5, dark blue =  $\beta$ -barrel. Membrane phosphates delimiting the hydrophobic core are shown as orange spheres; polysaccharide as dark yellow lines and other lipid as grey lines.

**Movie S4.** Replica 1 positional time evolution of POTRA domain center of mass for full length BamA embedded in LPS/PL membrane. The view is looking down the membrane normal toward the phospholipid surface of the membrane. The dark blue circle represents the center of the BamA  $\beta$ -barrel. Red = POTRA1, orange = POTRA2, khaki = POTRA3, light green = POTRA4, light blue = POTRA5. Note that the drift of POTRAs 1, 2 and 3 in this x, y plane (parallel to the membrane surface) is occasionally correlated whole POTRA domain drift is not due correlated with POTRA5 movement.

**Movie S5.** Replica 2 positional time evolution of POTRA domain center of mass for full length BamA embedded in LPS/PL membrane. The view is looking down the membrane normal toward the phospholipid surface of the membrane. The dark blue circle represents the center of the BamA  $\beta$ -barrel. Red = POTRA1, orange = POTRA2, khaki = POTRA3, light green = POTRA4, light blue = POTRA5. Note that the drift of POTRAs 1, 2 and 3 in this x, y plane (parallel to the membrane surface) is occasionally correlated whole POTRA domain drift is not due correlated with POTRA5 movement.

**Movie S6.** Replica 3 positional time evolution of POTRA domain center of mass for full length BamA embedded in LPS/PL membrane. The view is looking down the membrane normal toward the phospholipid surface of the membrane. The dark blue circle represents the center of the BamA  $\beta$ -barrel. Red = POTRA1, orange = POTRA2, khaki = POTRA3, light green = POTRA4, light blue = POTRA5. Note that the drift of POTRAs 1, 2 and 3 in this x, y plane (parallel to the membrane

surface) is occasionally correlated whole POTRA domain drift is not due correlated with POTRA5 movement.

**Movie S7.** POTRA5 relative motion is due to changes in principal axis angle not rotation around POTRA5 principal axis. The  $\beta$ -barrel and POTRA5 fragments from crystal structure 4K3B (translucent blue and orange, respectively) are aligned to the same from Replica 1 simulation at time zero (translucent blue and light blue, respectively). Simulation time shown is 1-540 ns.
