# Supplementary material
Source: PubMed Central journal article supplement (PMC4919588)
Supplement: mmc9.pdf [file mmc9.pdf]

# BamA POTRA Domain Interacts with a Native Lipid Membrane Surface

Patrick J. Fleming,<sup>1</sup> Dhilon S. Patel,<sup>2</sup> Emilia L. Wu,<sup>2</sup> Yifei Qi,<sup>2</sup> Min Sun Yeom,<sup>3</sup> Marcelo Carlos Sousa,<sup>4</sup> Karen G. Fleming,<sup>1</sup> and Wonpil Im<sup>2,\*</sup>

<sup>1</sup>T. C. Jenkins Department of Biophysics, John Hopkins University, Baltimore, Maryland; <sup>2</sup>Department of Molecular Biosciences and Center for Computational Biology, The University of Kansas, Lawrence, Kansas; <sup>3</sup>Korean Institute of Science and Technology Information, Yuseong-gu, Daejeon, Korea; and <sup>4</sup>Department of Chemistry and Biochemistry, University of Colorado Boulder, Boulder, Colorado

**ABSTRACT** The outer membrane of Gram-negative bacteria is an asymmetric membrane with lipopolysaccharides on the external leaflet and phospholipids on the periplasmic leaflet. This outer membrane contains mainly  $\beta$ -barrel transmembrane proteins and lipidated periplasmic proteins (lipoproteins). The multisubunit protein  $\beta$ -barrel assembly machine (BAM) catalyzes the insertion and folding of the  $\beta$ -barrel proteins into this membrane. In *Escherichia coli*, the BAM complex consists of five subunits, a core transmembrane  $\beta$ -barrel with a long periplasmic domain (BamA) and four lipoproteins (BamB/C/D/E). The BamA periplasmic domain is composed of five globular subdomains in tandem called POTRA motifs that are key to BAM complex formation and interaction with the substrate  $\beta$ -barrel proteins. The BAM complex is believed to undergo conformational cycling while facilitating insertion of client proteins into the outer membrane. Reports describing variable conformations and dynamics of the periplasmic POTRA domain have been published. Therefore, elucidation of the conformational dynamics of the POTRA domain in full-length BamA is important to understand the function of this molecular complex. Using molecular dynamics simulations, we present evidence that the conformational flexibility of the POTRA domain is modulated by binding to the periplasmic surface of a native lipid membrane. Furthermore, membrane binding of the POTRA domain is compatible with both BamB and BamD binding, suggesting that conformational selection of different POTRA domain conformations may be involved in the mechanism of BAM-facilitated insertion of outer membrane  $\beta$ -barrel proteins.

## INTRODUCTION

Gram-negative bacteria have an asymmetric outer membrane with lipopolysaccharides (LPS) in the external leaflet and phospholipids in the internal leaflet (1). The transmembrane proteins in these outer membranes are almost exclusively  $\beta$ -barrel structures and are important for transmembrane transport, cell recognition, protein domain anchoring, and membrane biogenesis (2,3). Although  $\beta$ -barrel outer membrane proteins (OMPs) are able to spontaneously insert and fold into phospholipid membranes in vitro (4–6), in the cell the OMPs diffuse from the Sec translocon in the inner membrane to the outer membrane surface across the periplasmic space while interacting with various chaperones (7–10). At the outer membrane, they are recognized by a multiprotein complex called the  $\beta$ -barrel assembly machine (BAM) that catalyzes insertion and folding of OMPs into the outer membrane (11–16).

The BAM complex consists of one copy each of five subunits (BamA/B/C/D/E) (17). The BamA subunit contains a transmembrane  $\beta$ -barrel and a large periplasmic domain composed of five globular polypeptide transport-associated (POTRA) motifs linked in tandem and numbered 1–5 from the N-terminal end (18–22). The POTRA motifs display an evolutionarily conserved fold but have low sequence conservation (19,22–26). The BamB/C/D/E subunits are lipoproteins bound to the periplasmic surface of the outer membrane through a covalent lipid modification (27,28). Although only BamA and BamD are essential for cell viability, individual deletion of any of the other subunits causes defects in OMP biogenesis and decreased cell viability under certain conditions (8,12,13,16,28–32).

A structural understanding of the subunit arrangement in the BAM complex has emerged from several independent x-ray crystallographic, NMR, and electron microscopy studies of either individual subunits or complexes of fragments of BamA/B, BamA/D, and BamC/D (18,19,21,23–26,33–37) and recent x-ray structures of the BamA/C/D/E (38,39) and BamA/B/C/D/E complexes (39,40). In addition, the

Submitted March 15, 2016, and accepted for publication May 9, 2016.

\*Correspondence: [wonpil@ku.edu](mailto:wonpil@ku.edu)

Editor: Emad Tajkhorshid.

<http://dx.doi.org/10.1016/j.bpj.2016.05.010>

© 2016 Biophysical Society.

POTRA domains have independently been shown to bind to BamB and BamD (29,32), and it has been suggested that they may template  $\beta$ -strand formation in client OMP polypeptides (23,24,39). BamA has been cross-linked to the periplasmic chaperone SurA (8,11), potentially indicating a docking site where unfolded OMPs are delivered to the BAM complex for membrane integration.

The multistep process of client OMP folding into the bacterial outer membrane together with the cyclic nature of the BAM catalysis (41–43) suggest that distinct conformations of the BAM complex may be required during different steps of OMP folding and membrane insertion. In addition, recent models of the involvement of BAM in the function of bacterial surface autotransporters include a hybrid two- $\beta$ -barrel complex that necessarily invokes large conformational rearrangements of BamA during secretion of the autotransporter passenger domains (44). Results of some crystallographic studies support the idea of multiple conformations as revealed in several distinct structures of BamA alone (19,23,24) and of BAM complexes (38–40). Two of these conformations are shown (Fig. 1 A) where the POTRA2–3 hinge exhibits the most flexibility in crystalline BamA alone. Similarly, NMR studies on isolated POTRA motif fragments in solution have shown various degrees of mobility at POTRA intermotif hinges, indicating either significant conformational flexibility or limited mobility depending on the domains in question and on experimental conditions (21,25). Recent molecular dynamics (MD) simulations of various assemblies of BAM embedded in a membrane have also shown variable flexibilities of the POTRA domain depending on the presence or absence of BAM lipoproteins (39). Because the POTRA motifs are connected in a linear fashion, the

extent of local flexibilities at POTRA intermotif joints will have large effects on the set of global conformations available to the BamA periplasmic domain. Similarly, binding of the BamA POTRA domain to either the membrane or other BAM subunits could selectively stabilize certain POTRA conformations. It is not known whether or not the complex undergoes subunit dissociation during its functional cycle.

Because conformational cycling may be essential to the BAM mechanism, we investigated BamA flexibility using MD simulations of BamA embedded in a model *Escherichia coli* outer membrane. Here, we report that POTRA-membrane interactions influence the set of observed conformations. The molecular basis of POTRA-membrane binding is encoded by specific, evolutionarily conserved hydrophobic interactions and by a large number of nonspecific interactions. Two POTRA3 tryptophan side chains insert into the lipid interface region. An important finding is the observation that the membrane-associated POTRA domain samples many orientations that are compatible with the known BamB-POTRA3 and BamD-POTRA5 interactions. Taken together, our simulations suggest that the POTRA domain's binding to lipoproteins and the membrane may act in concert to populate the functional conformations of the POTRA domain during the OMP insertion and folding cycle.

## MATERIALS AND METHODS

### MD simulations

An *E. coli* full-length BamA structural model was assembled using the N-terminal POTRA domain (residues 23–426) from the *E. coli* homology

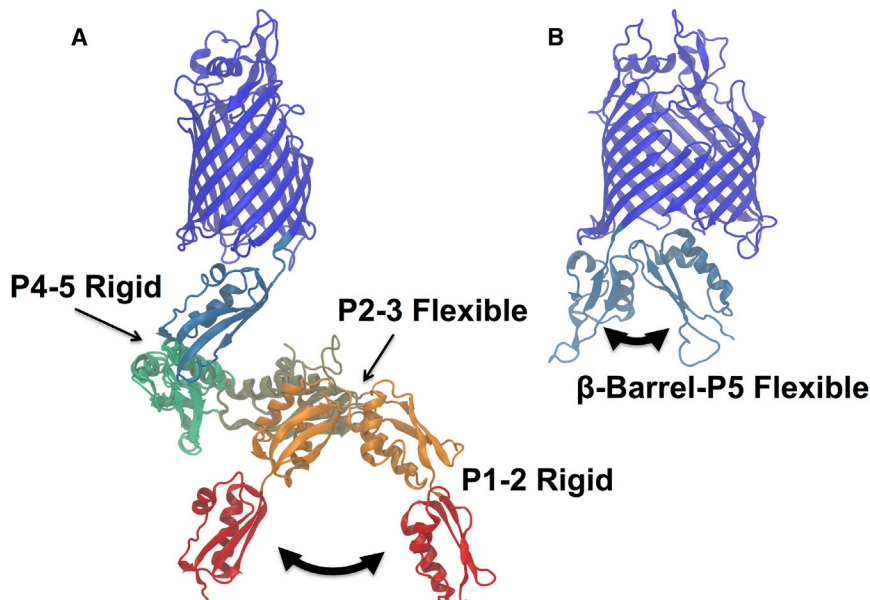

FIGURE 1 X-ray crystal structures suggest variable flexibility at POTRA interdomain linkers and  $\beta$ -barrel-POTRA5 joint. (A) Full-length BamA overlaid with two extreme POTRA domain conformations found in x-ray crystallographic structures of BamA and POTRA domain fragments. Backbone C $\alpha$  of POTRA4 were used for alignment. The POTRA2–3 hinge appears to have the most flexibility. Red, POTRA1; orange, POTRA2; khaki, POTRA3; light green, POTRA4; light blue, POTRA5; dark blue,  $\beta$ -barrel. Structures used were PDB: 4K3C (POTRA4–5- $\beta$ -barrel from *H. ducreyi*), PDB: 2QCZ and PDB: 3EFC (POTRA1–4 from *E. coli*). The same color scheme for individual POTRA motifs is used throughout this report. (B) BamA POTRA5- $\beta$ -barrel fragments with two different POTRA5 orientations. Structures used were PDB: 4K3B (*N. gonorrhoeae*) and PDB: 4K3C (*H. ducreyi*). To see this figure in color, go online.

model reported by Noinaj et al. (19): most of the  $\beta$ -barrel domain from crystal structure Protein Data Bank (PDB): 4N75 (20) and residues 715–740 from crystal structure PDB: 4C4V (18). The resultant full-length BamA model was embedded into an asymmetric bilayer whose acyl chain and headgroup composition was chosen to mimic a typical *E. coli* outer membrane (45) using the protocol implemented in CHARMM-GUI Membrane Builder (46,47) as previously described in (48) and also recently applied for OmpF simulations (49). The outer leaflet of the membrane was composed entirely of rough LPS with lipid A and R1 core (50), and the inner leaflet consisted of a mixture of PPPE, PVPG, and PVCL with a ratio of 15:4:1 (51), where PPPE is 16:0 (palmitoyl) - 16:1 *cis*-9 (palmitoleoyl) phosphatidylethanolamine, PVPG is 16:0 (palmitoyl) - 18:1 *cis*-11 (vaccenoyl) phosphatidylglycerol, and PVCL is 1,1'-palmitoyl-2,2'-vaccenoyl cardiolipin with a net charge of  $-2e$ . The MD systems were built with approximate dimensions of  $150 \times 150 \times 200 \text{ \AA}$  to allow space for full conformational freedom of the POTRA domain. This size resulted in a membrane with 225 PPPE, 60 PVPG, 15 PVCL, and 113 LPS molecules per BamA. In addition to 565 calcium ions (to neutralize LPS molecules),  $\sim 300$  potassium and  $\sim 180$  chloride ions (0.15 M KCl) were included to act as counter ions. The starting structure of full-length BamA embedded in the asymmetric LPS/PL membrane is shown in Fig. 2. The different domains of BamA are colored as in Fig. 1. Three independent systems with 391,584, 391,709, and 391,636 atoms (including water molecules) were separately built with different LPS orientations and phospholipid conformations and simulated for comparison of simulation results.

The POTRA4–5 and POTRA2–3 fragment structural models were separately constructed using crystal structures PDB: 3Q6B (26) and PDB: 3EFC (24), respectively. The MD systems of these fragments were generated using CHARMM-GUI Quick MD Simulator. The system dimensions were  $\sim 90 \times 90 \times 90 \text{ \AA}$ , and the systems were neutralized with 0.15 M KCl.

All MD systems were initially equilibrated with CHARMM (52) and then NAMD (53) was used for continued NPT (constant particle number, pressure, and temperature) simulations for 540 ns (BamA systems) and 400–500 ns (POTRA fragment systems) with the inputs provided by CHARMM-GUI (54) using the CHARMM C36 force field for protein (55), LPS (56), lipids (55), carbohydrates (57–59), and the TIP3P water

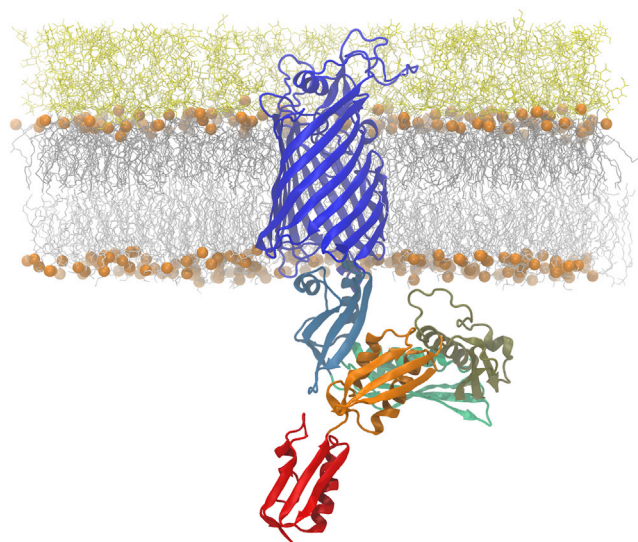

FIGURE 2 Starting structure of system for simulation. BamA is depicted as a ribbon drawing with coloring of motifs as in Fig. 1. Membrane lipid phosphates delimiting the hydrophobic core are shown as orange spheres, other membrane components as white sticks with LPS on top and phospholipid on the bottom. Note the extended loop in POTRA3 (*khaki*) that includes residues 200–213. To see this figure in color, go online.

model (60). During equilibration various planar and dihedral restraints were applied to the LPS molecules, phospholipids, and water molecules, and the restraint forces were gradually reduced during this process (see (48,50,56) for details). Additional dihedral angle restraints were applied to restrain all sugar rings to the pertinent chair conformation, which were maintained during the production simulations. Langevin dynamics was used to maintain constant temperature with a Langevin coupling coefficient set to  $1 \text{ ps}^{-1}$ , and a Nosé-Hoover Langevin-piston (61,62) was used to maintain constant pressure with a piston period of 50 fs and a piston decay time of 25 fs. A 2-fs timestep was used with the SHAKE algorithm (63). The van der Waals interactions were smoothly switched off at  $10\text{--}12 \text{ \AA}$  by a force-switching function (64), and the long-range electrostatic interactions were calculated using the particle-mesh Ewald (65) method. The temperature and pressure were held at 310.15 K and 1 bar, respectively. Both CHARMM (52) and VMD (66) were used for trajectory analysis.

## Evolutionary structural alignment

ConSurf (67) was used to create a multiple sequence alignment of BamA from sequences corresponding to 149 species of Gram-negative bacteria. A WebLogo graphical sequence alignment was created from the aligned sequences of POTRA1, 2, and 3 (68).

## Motif definitions and intermotif angle analysis

The POTRA domain mobility was analyzed using structural motifs of BamA defined as follows. POTRA1 corresponds to residues 23–90; POTRA2, residues 91–174; POTRA3, residues 175–264; POTRA4, residues 265–346; POTRA5, residues 347–422;  $\beta$ -barrel, residues describing the barrel strands only. The intermotif angles are defined for each linked pair of motifs using the angle between the major principal axes. To minimize the effects of backbone fluctuations on the orientation of the major principal axis, a copy of the POTRA1 structure from the BamA starting structure (Fig. 2) was first aligned to each different POTRA motif using  $C\alpha$  atoms of selected secondary structural elements. The principal axes were then calculated for the individual aligned POTRA1 motifs using the ORIENT plugin in VMD, and the respective major principal axes angles were calculated.

## RESULTS AND DISCUSSION

### Properties of the membrane systems containing full-length BamA

Three independent replicas of the BamA system (Fig. 2) were simulated for 540 ns each for a total of  $\sim 1.5 \mu\text{s}$ . Fig. S1 in the Supporting Material shows a time series of the membrane (i.e.,  $x$ - $y$ ) and system  $z$  dimensions for the systems, indicating that system equilibrium was achieved at  $\sim 200$  ns. This result is consistent with previous work in which the outer membrane showed slow movement of the LPS molecules (48). Fig. S2 shows a time series of the individual POTRA motif  $C\alpha$  root mean-square deviations (RMSD). Some backbone flexibility was observed in POTRA1 and POTRA3 with RMSD values transiently reaching up to  $\sim 6 \text{ \AA}$  for replica 2 (POTRA1) and  $\sim 4 \text{ \AA}$  for replica 3 (POTRA3). Significant deviations from the x-ray crystallographic structures in these POTRA motifs are localized in specific segments: the N-terminal  $\beta$ -strand (residues 23–34) in POTRA1 and the loop (residues 200–213)



between helices in POTRA3. This loop is uniquely longer than other POTRA loops as can be seen in Fig. 2. POTRA2 and POTRA5 in all three replicas exhibited RMSD values of  $<2$  Å for most simulation time. POTRA5 has the smallest backbone flexibility of the POTRA motifs.

### The BamA POTRA domain partitions onto the membrane surface

Crystal structures of the BAM complex have the POTRA domain projecting into the periplasm (38–40) with a conformation similar to the structures originally found for BamA alone (19) as shown in Fig. 1 A. Although these structures are relatively low resolution (2.7–3.3 Å) the fact that similar extended structures are observed in multiple space groups suggests that this conformation represents a low energy form with limited conformations. In contrast to this view, the results shown in Fig. 3 illustrate a striking finding that the POTRA domain interacts extensively with the periplasmic phospholipid membrane surface in the absence of BamB/C/D/E lipoproteins. Animations of the BamA POTRA domain conformational dynamics are further illustrated in Movies S1, S2, S3, S4, S5, and S6. Replicas 1 and 2 partition onto the membrane surface within 100 ns and 200 ns from the start of simulation. The POTRA domain in replica 3 (Fig. 3, right column) is the last to make contact (at ~230 ns) following a conformational diffusion in the aqueous space. Membrane binding is

most clearly reflected in all three replicas by an increase in the  $z$ -coordinate (perpendicular to the membrane plane) of the center of mass (COM) of a particular POTRA motif to  $-15$  Å below the phospholipid surface that is at  $z = 0$  (Fig. 3 B). Once bound to the membrane surface, the POTRA domain remains there for the rest of each simulation trajectory.

There are two major membrane-bound conformations observed in the simulations. Replicas 1 and 3 show that the POTRA domain undergoes a continued lateral diffusion in the  $x$ - $y$  plane on the membrane surface, illustrated by plots in Fig. 3 C and Movies S4, S5, and S6. POTRA1 (red) in replicas 1 and 3 laterally diffuses up to 60 Å and 90 Å with angular differences of up to  $56^\circ$  and  $78^\circ$ , respectively, relative to the initial structure. In contrast, replica 2 displays a distinct, more compact conformation in which there is a relatively smaller drift (30 Å and  $35^\circ$ ) on the  $x$ - $y$  plane.

By comparing the space explored by each of the POTRA motifs within a replica, Fig. 3, B and C, shows that there is a gradient of positional accessibilities along the POTRA domain. In all three replicas, the volume explored by POTRA1 is the highest, and this volume decreases as the motif number increases. In part, this gradient is expected as a consequence of the serial connectivity of the POTRA motifs. POTRA5 only has a restricted space available to it at the base of the membrane because one end is fixed to the BamA  $\beta$ -barrel. In contrast, the diffusion volume available to POTRA1 is a result of a concatenation of the spatial

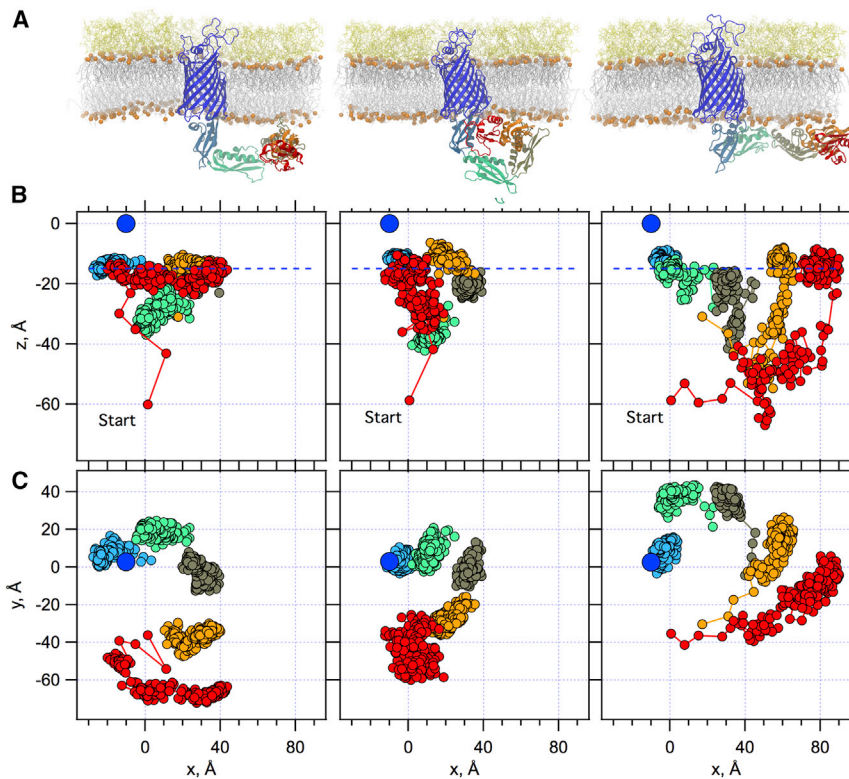

FIGURE 3 BamA POTRA domain mobility is modulated by membrane binding. (A) Snapshots at the end of each replica trajectory; (B)  $x$ ,  $z$  plots of the positional time evolution of individual POTRA motif's COM for full-length BamA embedded in LPS/phospholipid membranes; (C)  $x$ ,  $y$  plots of the same. The membrane periplasmic phospholipid phosphate atoms are centered at  $z = 0$  Å. The dark blue circle represents the phospholipid membrane surface at the center of the BamA  $\beta$ -barrel. Red, POTRA1; orange, POTRA2; khaki, POTRA3; light green, POTRA4; light blue, POTRA5. Replicas 1, 2, and 3 from left to right, respectively. Each POTRA excursion represents 540 ns of simulation using 10 ns steps; the starting position of POTRA1 is labeled, "Start" in (B). Individual  $x$ ,  $y$  plots are animated in Movies S4, S5, and S6. To see this figure in color, go online.



volumes available to each POTRA motif with respect to each other.

### Membrane partitioning by the POTRA domain involves both hydrophobic interactions and multiple hydrogen bonds with phospholipids

The molecular interactions of the POTRA domain with the *E. coli* model membrane surface are predominantly due to multivalent hydrogen bonding between phospholipid headgroups and both protein side chain and backbone atoms. These are illustrated by the time series of backbone and side-chain hydrogen bond formation with phospholipids (Figs. S3 and S4) and comprehensive contact maps (Fig. S5).

Fig. S3 shows that there are frequently >20 simultaneous hydrogen bonds between the POTRA domain and the membrane. Hydrogen bonds between POTRA side chains and phospholipids are not static because an individual side chain often hydrogen bonds with a succession of lipid partners (see Fig. S4, A–D, for four typical POTRA residue side-chain hydrogen bonding patterns from replica 1). Other residues have similar dynamic hydrogen bonding interactions. Tryptophan residues W205 and W206 in POTRA3 are also observed to dynamically insert into the membrane interfacial region as shown in the contact maps (Fig. S5). These multivalent interactions with different phospholipids and through hydrophobic partitioning allows the POTRA domain to remain on the membrane surface while simultaneously showing lateral drifting in a manner that is independent of the mobility of individual lipid components.

The contact maps (Fig. S5) illustrate the fraction of time that each residue is in contact with all other molecules for the last 140 ns (400–540 ns) of each trajectory. Each POTRA motif has different interaction patterns with the membrane, representing the dynamic nature of these interactions. Interestingly, POTRA2 has the most extensive contacts with the membrane in all three replicas. For replicas 1 and 2, the POTRA3 interhelical loop (residues 200–213) that contains W205 and W206 contacts the membrane early in the simulations and remains in contact throughout the simulations. In replica 3, this loop is rotated away from the membrane and the tryptophans do not partition into the membrane interface within the present simulation time.

The promiscuity and multiplicity of amino acid residue interactions between the POTRA domain and the membrane surface indicate that no particular residue interaction is a dominant energetic determinant of POTRA membrane binding. Fig. S6 shows the relative sequence conservation of POTRA motifs 1–3 based on an alignment of 149 homologous bacterial sequences (68). The membrane surface interacting with the POTRA domain has a net negative charge due to the presence of both phosphatidylglycerol (20%) and cardiolipin (5%). Khalid et al. (69) have reported the results of a MD simulation of OmpA in a dimyristoyl-phosphatidylcholine membrane where the periplasmic domain of

OmpA shows conformational dynamics and interaction with the membrane similar to the POTRA domain observed here. Although the phosphatidylcholine membrane has a net neutral surface charge the interactions of the OmpA periplasmic domain with the membrane were different in zero bulk salt versus 1 M NaCl conditions, suggesting that soluble protein/membrane interactions were electrostatic. The simulations reported here were carried out at 0.15 M KCl. However, specific POTRA basic residues interacting with the negative membrane surface are neither completely conserved nor are the membrane interacting residues of a specific physical/chemical type (Fig. S6, gray arrows). Of the POTRA residue positions that interact with the membrane, highly conserved residues in terms of amino acid attributes are W205 and W206 in the POTRA3 loop. These two aromatic residues are completely exposed on the surface of the POTRA3 motif, which is unusual in that tryptophans typically have only 10% of their accessible surface area exposed to the surface (70). These two residues are among the first to interact with the membrane potentially because the starting structure positions these exposed residues close to the membrane surface (see the residue 200–213 loop in Fig. 2). This segment in POTRA3 is different from all other POTRAs as was noted when the structure was solved (24). Sequence alignment shows that the loop containing residues 205–206 is rich in aromatic residues with at least one being present in all bacterial species.

### The POTRA1–2 and POTRA2–3 joints are highly flexible

The POTRA1–2 intermotif linker regions have been observed to be relatively inflexible between crystal structures (cf. Fig. 1 A) (19,24), and this rigidity is consistent with small-angle x-ray scattering (SAXS) results of a POTRA1–5 fragment (25). In contrast, some NMR and SAXS results suggested that this intermotif linker region is very flexible (21). The results from the current simulations of the full-length BamA in *E. coli* outer membranes show extreme flexibility of the POTRA1–2 joint as illustrated in Fig. 4 A. In this figure the time series of the intermotif angles (red curves) are overlaid upon the angles observed in several crystal structures (black horizontal lines). In replica 2, POTRA1 bends around to contact the side of POTRA2 as shown in the ribbons drawing in Fig. 4 A. This dramatic bend occurs immediately after POTRA1 contacts the membrane (see Movie S2). The flexibility of the POTRA1–2 joint in replica 2 can also be visualized in Movie S5 where the POTRA1 COM (red circles) moves to the side of the POTRA2 COM (orange circles) after 350 ns.

Several different POTRA2–3 intermotif angles have been observed in different crystal structures (cf. Fig. 1 A) (23,24), and NMR and SAXS results also indicate significant flexibility at this link (21). Crystallographic intermotif joint angles for POTRA2–3 fragments observed in several crystal

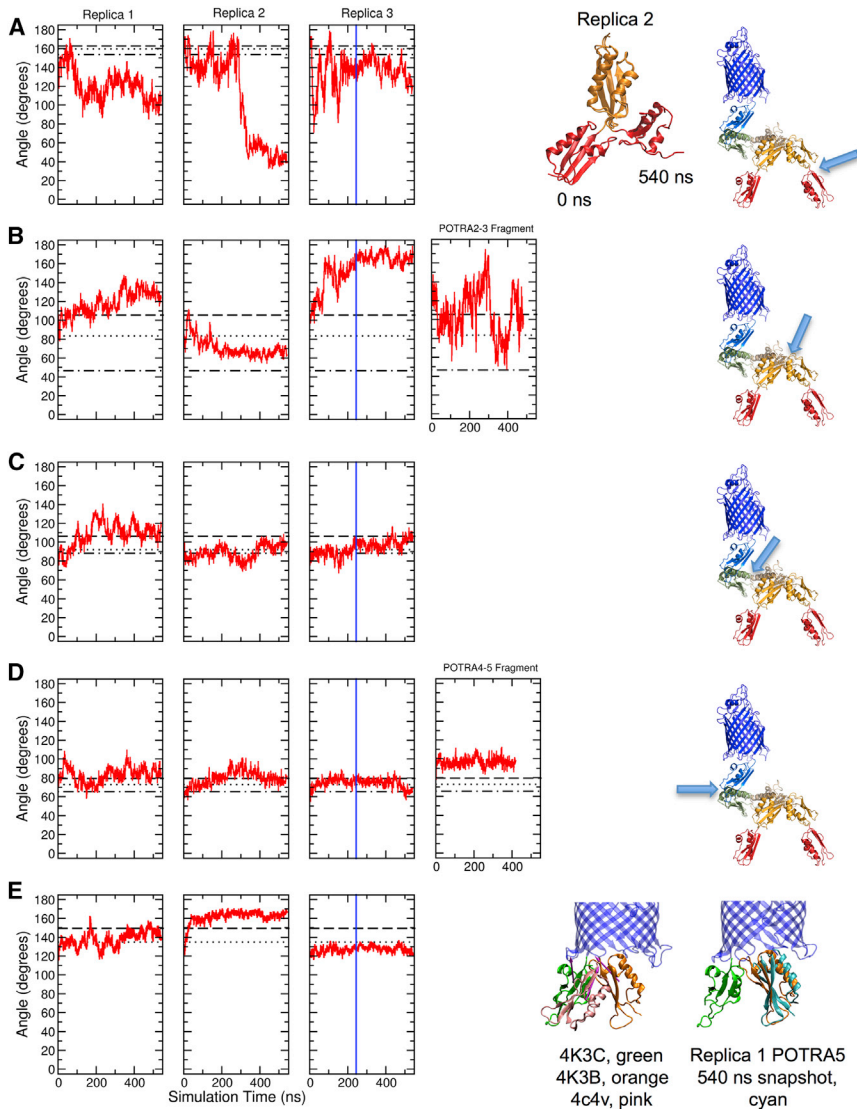

**FIGURE 4** POTRA intermotif angles in full-length BamA in *E. coli* outer membranes. (A–E, left three panels) POTRA1–2, POTRA2–3, POTRA3–4, POTRA4–5, and POTRA5- $\beta$ -barrel angles, respectively. Red curves, time series of intermotif POTRA major principal axes angles during MD simulations of full-length BamA/membrane systems. The vertical blue line in the third panel indicates time of contact between the POTRA domain and membrane in replica 3. (B and D, fourth panels) The same angles of a POTRA2–3 or POTRA4–5 fragment in solution, respectively, are plotted. Black horizontal lines represent respective crystal structure angles: (A) PDB: 2QDF, 163°, dashed lines; PDB: 3EFC, 160°, dotted lines; PDB: 4K3B, 154°, dot-dashed lines, (B) PDB: 3EFC, 106°, dashed lines; PDB: 4K3B, 84°, dotted lines; PDB: 2QDF, 47°, dot-dashed lines, (C) PDB: 2QDF, 106°, dashed lines; PDB: 4K3B, 92°, dotted lines; PDB: 3EFC, 88°, dot-dashed lines, (D) PDB: 4K3C, 79°, dashed lines; PDB: 3OG5 and PDB: 3Q6B (73° together), dotted lines; PDB: 4K3B, 66°, dot-dashed lines, (E) PDB: 4C4V, 149°, dashed lines; PDB: 4K3B and PDB: 4K3C (135° together), dotted lines. The replica 2 POTRA1–2 fragments from simulation times zero and 540 ns are shown as ribbon drawings aligned on POTRA2 at the right of (A); the respective intermotif angles plotted are indicated in the ribbons drawings with arrows in (A)–(D); the different POTRA5- $\beta$ -barrel orientations for three crystal structures are illustrated in the first ribbons drawings in (E). Although the intermotif principal axis angles are similar, precession of POTRA5 around the  $\beta$ -barrel axis (equivalent to the membrane normal) results in different POTRA orientations. The POTRA5- $\beta$ -barrel orientation of simulated BamA for all three replicas (cyan ribbons) was similar to that of PDB: 4K3B (orange ribbons) as illustrated in the second ribbons drawing in (E). To see this figure in color, go online.

structures are 106° (PDB: 3EFC), 84° (PDB: 4K3B), and 47° (PDB: 2QDF). We simulated a POTRA2–3 fragment alone in solution and observed that this fragment had extreme intermotif flexibility as shown in Fig. 4 B (right panel). This fragment samples intermotif angles from ~50° to ~170°. The left three panels in Fig. 4 B show that during simulation of the full-length BamA in *E. coli* outer membranes, the POTRA2–3 joint samples the same range of angles as the POTRA2–3 fragment in solution, although each full-length replica has a different range of angles as modulated by different interactions with the membranes.

### The POTRA3–4, POTRA4–5, and POTRA5- $\beta$ -barrel joints capture the limited flexibilities implied by crystal structures

In simulations of full-length BamA, the POTRA3–4 intermotif joint samples similar angles compared to the crystal

structures (88° to 106°) but replica 1 samples a slightly larger range of angles as shown in Fig. 4 C.

For the POTRA4–5 fragment, several independent crystal structures (PDB: 3OG5, 4K3B, 4K3C, 3Q6B) as well as solution SAXS and NMR studies show consistent intermotif angles (19,25,26). Taken together, these results suggest that the POTRA4–5 joint should be relatively fixed. As illustrated in Fig. 4 D the POTRA4–5 joint does show relatively low flexibility during simulation consistent with these structural studies. The intermotif angles are stabilized throughout the trajectories by interactions of R314 and R346 across the linker region as described for the crystal structure PDB: 3OG5 except that R314 at times exchanges D383 for D380. Fig. S7 illustrates these hydrogen bonds at a time when R314 is interacting with both D380 and D383.

The diffusion volumes illustrated in Fig. 3 and Movies S4, S5, and S6 are defined primarily by the level of flexibility of

the intermotif joint regions that connect each of the POTRA motifs to its neighbor. However, because crystal structures of BamA from two different species show different POTRA5- $\beta$ -barrel orientations from each other (Fig. 1 B) (19), we examined the possibility that the joint between the BamA  $\beta$ -barrel and POTRA5 might be a fulcrum point whose pivot capabilities could exert a large influence on the conformations available to the entire POTRA domain. A flexible joint at this position would allow a great deal of conformational space to be explored by the periplasmic domain of BamA, even if other POTRA interdomain joints were relatively rigid.

Fig. 4 E illustrates the time evolutions of the POTRA5- $\beta$ -barrel intermotif angles overlaid upon the angles observed in several crystal structures. This result shows that the mobility of this region in the simulations captures the limited flexibility of the crystal structures in terms of principal axis angles. Movies S4 and S6 show that the lateral drift of the POTRA123 COMs in the  $x$ - $y$  plane is not correlated with movement of the POTRA5 COM. Furthermore, Movie S7 shows that POTRA5 does not undergo a rotation around its major principal axis. The large drift of the POTRA domain observed in replicas 1 and 3 cannot therefore be completely explained by a fulcrum function of the POTRA5- $\beta$ -barrel joint.

### The lateral diffusion on the membrane surface is a concatenation of the POTRA intermotif joint flexibilities

Our conclusion from inspection of the individual intermotif flexibilities is that the lateral drift of the POTRA domain seen in Fig. 3 and Movies S1, S2, S3, S4, S5, and S6 is not due to a rigid arm rotating on a fulcrum at the base of the  $\beta$ -barrel but rather due to the concatenation of individual flexibilities at each intermotif joint. Additionally, the simulations suggest that the BamA POTRA domain generally has more flexibility than observed in crystal structures. It is possible that crystallization traps the POTRA domain in one of several lowest energy conformations but that in solution or while interacting with the membrane, the POTRA domain samples a wider range of conformations. The fact that we observed both a wide range of POTRA conformations and a frequent sampling of x-ray crystal structure in-

termotif angles suggest that the time of simulation was adequate to sample representative states of the BamA soluble domain.

The lateral diffusion of the POTRA domain observed in Fig. 3 is consistent with the 30° rotation of the POTRA domains revealed by two different crystal structures of the BAM complex (39). This rotation of the POTRA domains in crystal structures is coincident with tilting of  $\beta$ -barrel strands 1–6 (39). However, we did not observe any changes in the BamA  $\beta$ -barrel during simulations as discussed below.

### Binding of BamB and BamD is compatible with selected conformations of the membrane bound POTRA domain

BamB is known to bind to BamA (37,71), and a crystal structure of a BamB-POTRA3–5 fragment complex (71) in addition to recent crystal structures of the BamA/B/C/D/E complex (39,40) show that the BamB  $\beta$ -propeller contacts the face of the POTRA3  $\beta$ -sheet. For BamD, the only essential BAM lipoprotein (29), a crystal structure of a BamD-POTRA4–5 fragment identified the interface structural elements between subunits (33) and this interface has been confirmed in crystal structures of the BAM complex (38–40). To test whether the orientations of the POTRA domain in the membrane bound state are compatible with BamB and BamD binding, we docked both BamB and BamD onto the respective POTRA interfaces in individual frames of the simulations. A crystal structure BamB-POTRA3 fragment (PDB: 4PK1) and a separate BamD-POTRA5 fragment structure (PDB: 5EFR) were used for superposition; only the backbone atoms of the respective POTRA subunits were fit onto corresponding atoms of the simulated BamA structure. During the simulation trajectories of replicas 1 and 3 the POTRA domain is frequently in a compatible conformation for binding to BamB and BamD. A snapshot of such a conformation with both BamB and BamD docked in silico is shown in Fig. 5. In contrast, after superposition with replica 2, BamD is partially inserted into the membrane for most frames (not shown). These results suggest that lipoprotein binding to the BamA POTRA domain could select specific conformations from the range observed in this study.

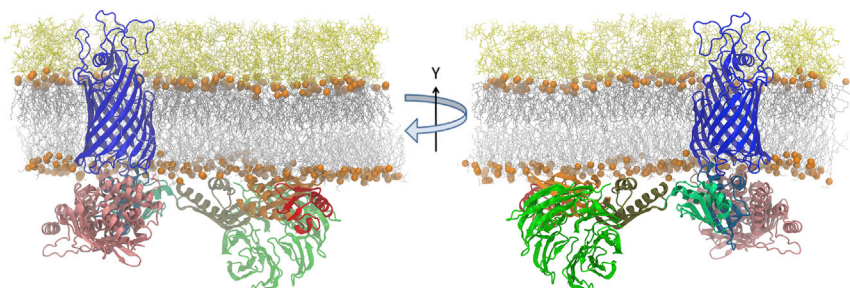

FIGURE 5 BamB and BamD binding is compatible with membrane bound POTRA domain. Trajectory snapshots of replica 3 showing BamB (green) docked to POTRA3 and BamD (pink) docked to POTRA5. The BamB-POTRA3 interface contacts are based on crystal structure PDB: 4PK1 and the BamD-POTRA5 interface contacts are based on crystal structure PDB: 5EFR. To see this figure in color, go online.



Gu et al. recently published results of MD simulations of BAM in a similar asymmetric membrane where the BAM contained various combinations of BAM assemblies (39). They report that in the absence of lipoproteins the POTRA domain of BamA exhibits greater dynamics. However, they did not observe extensive interaction of the POTRA motifs with the membrane. Gu et al. simulated individual systems for 100 ns and this may not have been long enough for the POTRA domain to diffuse up to the membrane as seen here for replica 3 where full membrane contact did not occur until ~230 ns of simulation (Fig. 3).

### POTRA-membrane interaction does not affect POTRA5 internal conformational dynamics

POTRA5 has been reported to exhibit internal conformational plasticity that may be important for the binding of BamD to BamA and to the overall function of the BAM complex (29,72). Because interactions of the POTRA domain with the membrane may influence the internal conformational dynamics of POTRA5, we investigated its intramotif interactions in more detail. Unlike POTRA1–4 motifs, which have a hydrophobic core, POTRA5 has a network of electrostatic interactions that extend to the domain surface. Sinnige et al. (72) used NMR to show conformational plasticity of this network on the micro- to millisecond timescale and employed MD simulations to demonstrate interchanging electrostatic interactions between K351, D362, R366, and E373. We compared the hydrogen bonding patterns of this region of full-length BamA in outer membranes to determine if the POTRA domain mobility influences the core of POTRA5. Fig. S8 shows three snapshots from a trajectory of this region revealing distinct hydrogen bonding patterns. In addition to the interactions described by Sinnige et al. we also observed hydrogen bonding between R366 and E521, which is in a  $\beta$ -barrel loop. Fig. S9, A–C, shows the time evolved interchange of hydrogen bonding partners of the central residue R366 in all three replicas. We observed similar dynamic exchange to that reported by Sinnige et al. Although the POTRA1–3 motifs are partially limited in their conformational dynamics by interaction with the membrane, this distal interaction does not seem to affect the internal conformational plasticity of the POTRA5 electrostatic network. Interestingly, despite this internal plasticity, POTRA5 exhibited the smallest backbone RMSD of all POTRA motifs during simulation (Fig. S2).

### Protein crowding limits POTRA domain dynamics

In contrast to the results presented here, Sinnige et al. previously reported limited dynamics in the POTRA domain of membrane embedded BamA using solid-state NMR (73). In these experiments BamA was reconstituted into liposomes with lipid/protein ratios of 25:1 to 150:1. To approx-

imate this condition in silico, we separately built and simulated two systems containing full-length BamA in smaller asymmetric membrane surface areas for ~1.2  $\mu$ s. These systems contained a membrane surface of 90  $\times$  90 Å and inner leaflet phospholipid/protein molar ratio of 100:1 (equivalent to a total phospholipid/protein ratio of 200:1 in a symmetric phospholipid membrane). It was clear that these systems were too small to allow the POTRA domain to explore complete conformational freedom. As shown in Fig. S10, the BamA molecules in periodic boundary neighboring cells came into stable contact. Such neighbor contacts occurred in both systems within 250 ns simulation time and remained intact throughout the remainder of the simulations. The contacts were not the same in both systems: in one case POTRA1 contacted POTRA4 and in the other POTRA2 contacted a different segment of POTRA4. In proteoliposomes with a phospholipid ratio of 25:1 to 150:1, a similar neighbor-neighbor contact would occur and limit the mobility of the POTRA domains. Such inter-BamA interaction would not be expected in the bacterial cell membrane. The estimated cell copy number of BamA is ~200 molecules (74); these BamA molecules appear to be dispersed in the bacterial outer membrane and surrounded by recently folded client OMPs (75).

### The BamA $\beta$ -barrel has a small effect on membrane thickness

The BamA  $\beta$ -barrel exhibits an asymmetric transmembrane hydrophobic thickness; the side containing the strand1/16 seam is between 12 Å (L780 to Y432) and 16 Å (W810 to V438) thick compared to ~24 Å on the opposite side (48). Because the hydrophobic thickness of the *E. coli* outer membrane is ~24–25 Å (76), it has been proposed that the membrane in proximity to the strand1–16 seam is destabilized by hydrophobic mismatch. Previous simulation results of the *Neisseria gonorrhoeae* and *Haemophilus ducreyi* BamA  $\beta$ -barrel in gel-like dimyristoyl-phosphatidylethanolamine bilayers showed a dramatic thinning near the strand1–16 seam (19). However, as shown in Fig. 6 we observed membrane thinning of only a few Ångstroms (to ~20 Å thickness) of small patches of the outer membrane in the vicinity of the BamA  $\beta$ -barrel. Furthermore, areas of this thinning were not consistently proximate to the strand1/16 seam among the three replicate systems (Fig. S11). Similar thinning was observed during simulations of the  $\beta$ -barrel protein OmpLA in the outer membrane of the same lipid composition (48).

### Lateral gate opening is not observed in these simulations using the *E. coli* outer membrane

One of the most interesting discoveries from early simulations of BamA barrel structures from *N. gonorrhoeae* and

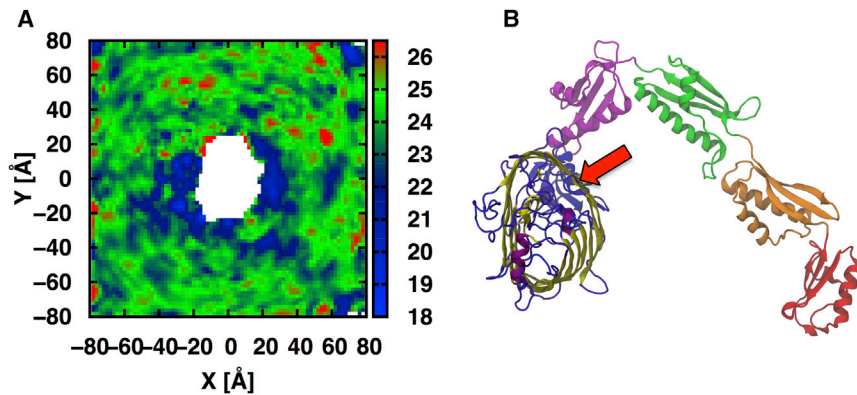

FIGURE 6 (A) Two-dimensional  $z$ -thickness of the LPS/phospholipid membrane with embedded full-length BamA. Average of replicas 1–3. Thickness is defined as the distance between the average of C2 and C4 atoms of lipid A (combined) and the average C2 positions of phospholipids within a 2 Å grid and represents the hydrophobic thickness. (B) The relative orientation of the embedded BamA; the red arrow points to the strand 1–16 seam position. The  $z$ -thickness of individual replicas is shown in Fig. S11. To see this figure in color, go online.

*H. ducreyi* in symmetric dimyristoyl-phosphatidylethanolamine membranes was the lateral opening of the  $\beta$ -barrel between strand 1 and strand 16 (19). In addition, recent crystal structures of BamA/C/D/E complexes in detergent show twisting of strands 1–8 and opening of the barrel between strands 1 and 16 (38,39). The cavity of the BamA  $\beta$ -barrel contains significant water as illustrated in Fig. 7, A and B. The average numbers of waters inside the cavity ( $z = \pm 10$  Å) are 403, 377, and 427 for replicas 1, 2, and 3, respectively. As we observed only approximately a 4 Å thinning of the LPS/phospholipid membrane (to  $\sim 20$  Å hydrophobic core thickness proximal to the BamA barrel) during our simulations (Fig. 6), opening of the barrel would expose this cavity water to the hydrophobic core of the membrane. Similar water numbers in the cavity of the

SecY translocon were recently found to have anomalous behavior and were partially displaced by lipid acyl chain incursions into the translocon cavity (77).

In  $\sim 5$ - $\mu$ s total simulation of full-length BamA at 310 K in membranes that mimic the *E. coli* outer membrane, we observed neither a separation of strands 1 and 16 nor a register shift of hydrogen bonding in this region. Fig. 7 C shows the time series of the average number of hydrogen bonds between strands 1 and 16 for several systems. The three replicate systems with large membrane surface areas ( $150 \times 150$  Å) maintained an average of  $\sim 4$  interstrand hydrogen bonds. Two systems with smaller membrane surface area ( $90 \times 90$  Å) started out with four interstrand hydrogen bonds but the C-terminus curled into the barrel cavity breaking  $\sim 2$  hydrogen bonds (Fig. 7 D). A similar inward curl of the

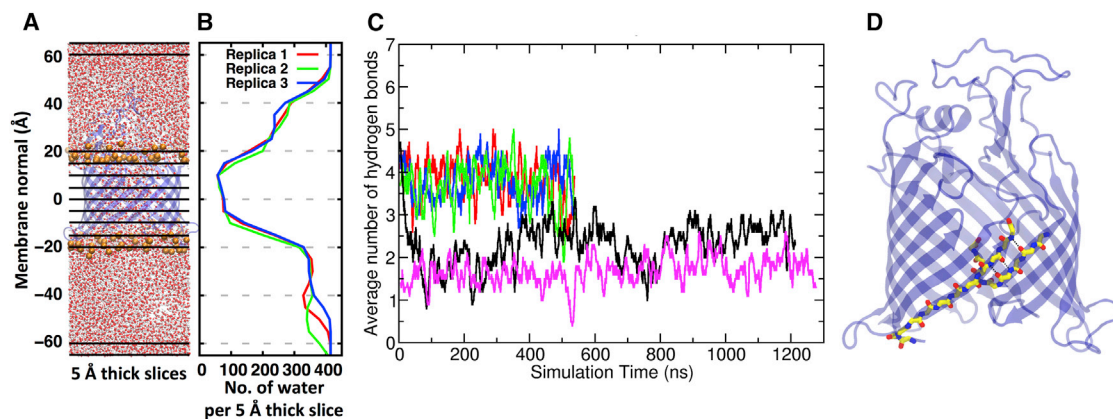

FIGURE 7 The BamA  $\beta$ -barrel is water-filled and stable. (A) Water distribution within the BamA cavity. A snapshot of replica 1 trajectory cropped to a  $50 \times 50 \times 130$  Å prism highlighting the continuous water filled cavity. Water is shown in red (oxygen) and white (hydrogen) ball-stick representation. Lipid phosphates delimiting the hydrophobic core of the membrane are shown as orange spheres, BamA is shown as a ribbon representation. Black horizontal lines represent 5 Å thick slabs parallel to the membrane plane used to subdivide the prism for calculating water density as a function of position along the membrane normal (for clarity, 5-Å-thick slabs are not shown inside whole box). (B) Time-averaged number of water molecules within 5-Å thick slabs from 100 to 540 ns of the simulations in all three replicas. (C) BamA  $\beta$ -barrel strands 1–16 remain hydrogen bonded. A time series of the average number backbone hydrogen bonds between strand 1 (residues 427 to 434) and adjacent strand 16 (residues 803 to 810). Criteria were distance of 3.0 Å and minimum angle cutoff of 45°, averages were over 10 ns. Red, blue, and green curves represent replicas 1, 2, and 3 of the main systems in this study, respectively. Black and magenta curves represent average hydrogen bonds for the smaller membrane systems shown in Fig. S10. (D) In these smaller systems the C-terminus (residues 808–810) curled into the barrel cavity and therefore the number of interstrand hydrogen bonds decreased to an average of 2–3 but the strands 1–16 never opened (replica 2 is shown). An inward curl of the C-terminus was also seen in the crystal structure of *N. gonorrhoeae* BamA (19). To see this figure in color, go online.

C-terminus is seen in the crystal structure of *N. gonorrhoeae* BamA (19). At no time during our simulations did the strand1/16 seam open. In fact, the  $\beta$ -barrel strands showed small fluctuations. Fig. S12, A–C, shows images of the BamA  $\beta$ -barrel average structures from simulations of the full-length BamA in outer membranes color keyed to C $\alpha$  root mean-square fluctuation (RMSF). The barrel strands were very stable with C $\alpha$  RMSF values of  $<1$  Å but the external loops showed higher dynamic flexibilities. This difference in relative movement can be observed in Fig. S13, where the calculated RMSF values of C $\alpha$  atoms in the BamA  $\beta$ -barrel are plotted as a function of residue number. Both the C-terminal segment of loop 6 (residues 670–705) and loop 7 extend to the very top of the barrel and exhibit the largest RMSF values. Other loops have RMSF values between 1 and 2 Å, mobility slightly larger than loops of OmpLA in a similar *E. coli* membrane (48). No consistent difference in the mobility of loops and turns is observed.

## CONCLUSION

The POTRA domain of BamA without BamB/C/D/E lipoproteins partitions onto the surface of the phospholipid leaflet of an *E. coli* outer membrane in orientations that are competent to interact with BamB and BamD. Both hydrophobic insertions of the conserved aromatic residues (W205 and W206) into the membrane and numerous POTRA side-chain hydrogen bonds with the membrane phospholipid raise the idea that membrane-bound orientations of the BamA POTRA domain may be long lived. Significant conformational flexibility of the intermotif linker regions is observed, which results in lateral drift of the POTRA domains along the membrane surface. BamA alone shows extreme conformational flexibility and long-lived interactions with the membrane. However, only a subset of these conformations is compatible with the binding of BamB and the BamC/D/E subcomplex. This suggests that one important role of BAM lipoproteins is to modulate the BamA conformations to select those that are important for the OMP folding and insertion cycle. Weak binding between the POTRA domain and lipoproteins also could facilitate conformational cycling of the BamA during its functional cycle. Finally, with  $\sim 4$  Å thinning of the outer membrane near BamA, a lateral gate opening between strand1 and strand16 is not observed in our simulations.

## SUPPORTING MATERIAL

Thirteen figures and seven movies are available at [http://www.biophysj.org/biophysj/supplemental/S0006-3495\(16\)30287-9](http://www.biophysj.org/biophysj/supplemental/S0006-3495(16)30287-9).

## AUTHOR CONTRIBUTIONS

P.J.F., D.S.P., M.C.S., K.G.F., and W.I. designed the research; P.J.F., D.S.P., E.L.W., M.C.S., Y.Q., and M.S.Y. performed the research; P.J.F.

and D.S.P. analyzed the data; P.J.F., K.G.F., M.C.S., D.S.P., and W.I. wrote the article.

## ACKNOWLEDGMENTS

This work was supported by National Institutes of Health (NIH) grants U54GM087519 (to W.I.), R01AI080709 (to M.C.S.), and R01GM079440 (to K.G.F.) and National Science Foundation (NSF) grants MCB-1516154 (to W.I.), DBI-1145987 (to W.I.), and MCB1412108 (to K.G.F.). This work used the computational resources at the National Institute of Supercomputing and Networking/Korea Institute of Science and Technology Information including technical support (KSC-2015-C3-004 to M.S.Y.), the Maryland Advanced Research Computing Center (MARCC to K.G.F.), and the Extreme Science and Engineering Discovery Environment (XSEDE MCB070009 to W.I. and MCB120050 to K.G.F.), which is supported by National Science Foundation grant No. ACI-1053575.

## REFERENCES

1. Nikaïdo, H., and M. Vaara. 1985. Molecular basis of bacterial outer membrane permeability. *Microbiol. Rev.* 49:1–32.
2. Nikaïdo, H. 2003. Molecular basis of bacterial outer membrane permeability revisited. *Microbiol. Mol. Biol. Rev.* 67:593–656.
3. Koebnik, R., K. P. Locher, and P. Van Gelder. 2000. Structure and function of bacterial outer membrane proteins: barrels in a nutshell. *Mol. Microbiol.* 37:239–253.
4. Surrey, T., and F. Jähnig. 1992. Refolding and oriented insertion of a membrane protein into a lipid bilayer. *Proc. Natl. Acad. Sci. USA.* 89:7457–7461.
5. Kleinschmidt, J. H., and L. K. Tamm. 1996. Folding intermediates of a beta-barrel membrane protein. Kinetic evidence for a multi-step membrane insertion mechanism. *Biochemistry.* 35:12993–13000.
6. Burgess, N. K., T. P. Dao, ..., K. G. Fleming. 2008. Beta-barrel proteins that reside in the *Escherichia coli* outer membrane in vivo demonstrate varied folding behavior in vitro. *J. Biol. Chem.* 283:26748–26758.
7. Bos, M. P., V. Robert, and J. Tommassen. 2007. Biogenesis of the gram-negative bacterial outer membrane. *Annu. Rev. Microbiol.* 61:191–214.
8. Sklar, J. G., T. Wu, ..., T. J. Silhavy. 2007. Defining the roles of the periplasmic chaperones SurA, Skp, and DegP in *Escherichia coli*. *Genes Dev.* 21:2473–2484.
9. Tommassen, J. 2010. Assembly of outer-membrane proteins in bacteria and mitochondria. *Microbiology.* 156:2587–2596.
10. Mogensen, J. E., and D. E. Otzen. 2005. Interactions between folding factors and bacterial outer membrane proteins. *Mol. Microbiol.* 57:326–346.
11. Bennion, D., E. S. Charlson, ..., R. Misra. 2010. Dissection of  $\beta$ -barrel outer membrane protein assembly pathways through characterizing BamA POTRA 1 mutants of *Escherichia coli*. *Mol. Microbiol.* 77:1153–1171.
12. Bos, M. P., V. Robert, and J. Tommassen. 2007. Functioning of outer membrane protein assembly factor Omp85 requires a single POTRA domain. *EMBO Rep.* 8:1149–1154.
13. Gentle, I., K. Gabriel, ..., T. Lithgow. 2004. The Omp85 family of proteins is essential for outer membrane biogenesis in mitochondria and bacteria. *J. Cell Biol.* 164:19–24.
14. Hagan, C. L., S. Kim, and D. Kahne. 2010. Reconstitution of outer membrane protein assembly from purified components. *Science.* 328:890–892.
15. Voulhoux, R., and J. Tommassen. 2004. Omp85, an evolutionarily conserved bacterial protein involved in outer-membrane-protein assembly. *Res. Microbiol.* 155:129–135.



16. Werner, J., and R. Misra. 2005. YaeT (Omp85) affects the assembly of lipid-dependent and lipid-independent outer membrane proteins of *Escherichia coli*. *Mol. Microbiol.* 57:1450–1459.
17. Ricci, D. P., and T. J. Silhavy. 2012. The Bam machine: a molecular cooper. *Biochim. Biophys. Acta.* 1818:1067–1084.
18. Albrecht, R., M. Schütz, ..., K. Zeth. 2014. Structure of BamA, an essential factor in outer membrane protein biogenesis. *Acta Crystallogr. D Biol. Crystallogr.* 70:1779–1789.
19. Noinaj, N., A. J. Kuszak, ..., S. K. Buchanan. 2013. Structural insight into the biogenesis of  $\beta$ -barrel membrane proteins. *Nature.* 501:385–390.
20. Ni, D., Y. Wang, ..., Y. Huang. 2014. Structural and functional analysis of the  $\beta$ -barrel domain of BamA from *Escherichia coli*. *FASEB J.* 28:2677–2685.
21. Knowles, T. J., M. Jeeves, ..., I. R. Henderson. 2008. Fold and function of polypeptide transport-associated domains responsible for delivering unfolded proteins to membranes. *Mol. Microbiol.* 68:1216–1227.
22. Sánchez-Pulido, L., D. Devos, ..., A. Valencia. 2003. POTRA: a conserved domain in the FtsQ family and a class of beta-barrel outer membrane proteins. *Trends Biochem. Sci.* 28:523–526.
23. Kim, S., J. C. Malinverni, ..., D. Kahne. 2007. Structure and function of an essential component of the outer membrane protein assembly machine. *Science.* 317:961–964.
24. Gatzeva-Topalova, P. Z., T. A. Walton, and M. C. Sousa. 2008. Crystal structure of YaeT: conformational flexibility and substrate recognition. *Structure.* 16:1873–1881.
25. Gatzeva-Topalova, P. Z., L. R. Warner, ..., M. C. Sousa. 2010. Structure and flexibility of the complete periplasmic domain of BamA: the protein insertion machine of the outer membrane. *Structure.* 18:1492–1501.
26. Zhang, H., Z. Q. Gao, ..., Y. H. Dong. 2011. High-resolution structure of a new crystal form of BamA POTRA4–5 from *Escherichia coli*. *Acta Crystallogr. Sect. F Struct. Biol. Cryst. Commun.* 67:734–738.
27. Wu, T., J. Malinverni, ..., D. Kahne. 2005. Identification of a multi-component complex required for outer membrane biogenesis in *Escherichia coli*. *Cell.* 121:235–245.
28. Sklar, J. G., T. Wu, ..., T. J. Silhavy. 2007. Lipoprotein SmpA is a component of the YaeT complex that assembles outer membrane proteins in *Escherichia coli*. *Proc. Natl. Acad. Sci. USA.* 104:6400–6405.
29. Malinverni, J. C., J. Werner, ..., T. J. Silhavy. 2006. YfiO stabilizes the YaeT complex and is essential for outer membrane protein assembly in *Escherichia coli*. *Mol. Microbiol.* 61:151–164.
30. Ricci, D. P., C. L. Hagan, ..., T. J. Silhavy. 2012. Activation of the *Escherichia coli*  $\beta$ -barrel assembly machine (Bam) is required for essential components to interact properly with substrate. *Proc. Natl. Acad. Sci. USA.* 109:3487–3491.
31. Rigel, N. W., J. Schwalm, ..., T. J. Silhavy. 2012. BamE modulates the *Escherichia coli* beta-barrel assembly machine component BamA. *J. Bacteriol.* 194:1002–1008.
32. Vuong, P., D. Bennion, ..., R. Misra. 2008. Analysis of YfgL and YaeT interactions through bioinformatics, mutagenesis, and biochemistry. *J. Bacteriol.* 190:1507–1517.
33. Bergal, H. T., A. H. Hopkins, ..., M. C. Sousa. 2016. The structure of a BamA-BamD fusion illuminates the architecture of the beta-barrel assembly machine core. *Structure.* 24:243–251.
34. Albrecht, R., and K. Zeth. 2011. Structural basis of outer membrane protein biogenesis in bacteria. *J. Biol. Chem.* 286:27792–27803.
35. Dong, C., H. F. Hou, ..., Y. H. Dong. 2012. Structure of *Escherichia coli* BamD and its functional implications in outer membrane protein assembly. *Acta Crystallogr. D Biol. Crystallogr.* 68:95–101.
36. Kim, K. H., and M. Paetzel. 2011. Crystal structure of *Escherichia coli* BamB, a lipoprotein component of the  $\beta$ -barrel assembly machinery complex. *J. Mol. Biol.* 406:667–678.
37. Noinaj, N., J. W. Fairman, and S. K. Buchanan. 2011. The crystal structure of BamB suggests interactions with BamA and its role within the BAM complex. *J. Mol. Biol.* 407:248–260.
38. Bakelar, J., S. K. Buchanan, and N. Noinaj. 2016. The structure of the  $\beta$ -barrel assembly machinery complex. *Science.* 351:180–186.
39. Gu, Y., H. Li, ..., C. Dong. 2016. Structural basis of outer membrane protein insertion by the BAM complex. *Nature.* 531:64–69.
40. Han, L., J. Zheng, ..., Y. Huang. 2016. Structure of the BAM complex and its implications for biogenesis of outer-membrane proteins. *Nat. Struct. Mol. Biol.* 23:192–196.
41. Hagan, C. L., T. J. Silhavy, and D. Kahne. 2011.  $\beta$ -Barrel membrane protein assembly by the Bam complex. *Annu. Rev. Biochem.* 80:189–210.
42. Plummer, A. M., and K. G. Fleming. 2015. BamA alone accelerates outer membrane protein folding in vitro through a catalytic mechanism. *Biochemistry.* 54:6009–6011.
43. Rigel, N. W., D. P. Ricci, and T. J. Silhavy. 2013. Conformation-specific labeling of BamA and suppressor analysis suggest a cyclic mechanism for  $\beta$ -barrel assembly in *Escherichia coli*. *Proc. Natl. Acad. Sci. USA.* 110:5151–5156.
44. Bernstein, H. D. 2015. Looks can be deceiving: recent insights into the mechanism of protein secretion by the autotransporter pathway. *Mol. Microbiol.* 97:205–215.
45. Lugtenberg, E. J., and R. Peters. 1976. Distribution of lipids in cytoplasmic and outer membranes of *Escherichia coli* K12. *Biochim. Biophys. Acta.* 441:38–47.
46. Jo, S., T. Kim, ..., W. Im. 2008. CHARMM-GUI: a web-based graphical user interface for CHARMM. *J. Comput. Chem.* 29:1859–1865.
47. Wu, E. L., X. Cheng, ..., W. Im. 2014. CHARMM-GUI Membrane Builder toward realistic biological membrane simulations. *J. Comput. Chem.* 35:1997–2004.
48. Wu, E. L., P. J. Fleming, ..., W. Im. 2014. *E. coli* outer membrane and interactions with OmpLA. *Biophys. J.* 106:2493–2502.
49. Patel, D. S., S. Re, ..., W. Im. 2016. Dynamics and interactions of OmpF and LPS: influence on pore accessibility and ion permeability. *Biophys. J.* 110:930–938.
50. Wu, E. L., O. Engström, ..., W. Im. 2013. Molecular dynamics and NMR spectroscopy studies of *E. coli* lipopolysaccharide structure and dynamics. *Biophys. J.* 105:1444–1455.
51. Vance, D. E., and J. E. Vance. 2002. *Biochemistry of Lipids, Lipoproteins, and Membranes*. Elsevier, Amsterdam; Boston.
52. Brooks, B. R., C. L. Brooks, 3rd, ..., M. Karplus. 2009. CHARMM: the biomolecular simulation program. *J. Comput. Chem.* 30:1545–1614.
53. Phillips, J. C., R. Braun, ..., K. Schulten. 2005. Scalable molecular dynamics with NAMD. *J. Comput. Chem.* 26:1781–1802.
54. Lee, J., X. Cheng, ..., W. Im. 2016. CHARMM-GUI input generator for NAMD, GROMACS, AMBER, OpenMM, and CHARMM/OpenMM simulations using the CHARMM36 additive force field. *J. Chem. Theory Comput.* 12:405–413.
55. Klauda, J. B., R. M. Venable, ..., R. W. Pastor. 2010. Update of the CHARMM all-atom additive force field for lipids: validation on six lipid types. *J. Phys. Chem. B.* 114:7830–7843.
56. Jo, S., E. L. Wu, ..., W. Im. 2015. Lipopolysaccharide membrane building and simulation. *Methods Mol. Biol.* 1273:391–406.
57. Guvench, O., S. N. Greene, ..., A. D. Mackerell, Jr. 2008. Additive empirical force field for hexopyranose monosaccharides. *J. Comput. Chem.* 29:2543–2564.
58. Hatcher, E., O. Guvench, and A. D. Mackerell. 2009. CHARMM additive all-atom force field for aldopentofuranoses, methyl-aldopentofuranosides, and fructofuranose. *J. Phys. Chem. B.* 113:12466–12476.
59. Guvench, O., E. R. Hatcher, ..., A. D. Mackerell. 2009. CHARMM additive all-atom force field for glycosidic linkages between hexopyranoses. *J. Chem. Theory Comput.* 5:2353–2370.
60. Jorgensen, W. L., J. Chandrasekhar, ..., M. L. Klein. 1983. Comparison of simple potential functions for simulating liquid water. *J. Chem. Phys.* 79:926–935.
61. Feller, S. E., Y. Zhang, ..., B. R. Brooks. 1995. Constant pressure molecular dynamics simulation: the Langevin piston method. *J. Chem. Phys.* 103:4613–4621.

62. Martyna, G. J., D. J. Tobias, and M. L. Klein. 1994. Constant-pressure molecular-dynamics algorithms. *J. Chem. Phys.* 101:4177–4189.
63. Ryckaert, J. P., G. Ciccoliti, and H. J. C. Berendsen. 1977. Numerical integration of the cartesian equations of motion of a system with constraints: molecular dynamics of *n*-alkanes. *J. Comput. Phys.* 23:327–341.
64. Steinbach, P. J., and B. R. Brooks. 1994. New spherical-cutoff methods for long-range forces in macromolecular simulation. *J. Comput. Chem.* 15:667–683.
65. Essmann, U., L. Perera, ..., L. G. Pedersen. 1995. A smooth particle mesh Ewald method. *J. Chem. Phys.* 103:8577–8593.
66. Humphrey, W., A. Dalke, and K. Schulten. 1996. VMD: visual molecular dynamics. *J. Mol. Graph.* 14:33–38, 27–38.
67. Ashkenazy, H., E. Erez, ..., N. Ben-Tal. 2010. ConSurf 2010: calculating evolutionary conservation in sequence and structure of proteins and nucleic acids. *Nucleic Acids Res.* 38:W529–W533.
68. Crooks, G. E., G. Hon, ..., S. E. Brenner. 2004. WebLogo: a sequence logo generator. *Genome Res.* 14:1188–1190.
69. Khalid, S., P. J. Bond, ..., M. S. Sansom. 2008. OmpA: gating and dynamics via molecular dynamics simulations. *Biochim. Biophys. Acta.* 1778:1871–1880.
70. Lins, L., A. Thomas, and R. Brasseur. 2003. Analysis of accessible surface of residues in proteins. *Protein Sci.* 12:1406–1417.
71. Jansen, K. B., S. L. Baker, and M. C. Sousa. 2015. Crystal structure of BamB bound to a periplasmic domain fragment of BamA, the central component of the  $\beta$ -barrel assembly machine. *J. Biol. Chem.* 290:2126–2136.
72. Sinnige, T., M. Weingarth, ..., M. Baldus. 2015. Conformational plasticity of the POTRA 5 domain in the outer membrane protein assembly factor BamA. *Structure.* 23:1317–1324.
73. Sinnige, T., M. Weingarth, ..., M. Baldus. 2014. Solid-state NMR studies of full-length BamA in lipid bilayers suggest limited overall POTRA mobility. *J. Mol. Biol.* 426:2009–2021.
74. Masuda, T., N. Saito, ..., Y. Ishihama. 2009. Unbiased quantitation of *Escherichia coli* membrane proteome using phase transfer surfactants. *Mol. Cell. Proteomics.* 8:2770–2777.
75. Kleanthous, C., P. Rassam, and C. G. Baumann. 2015. Protein-protein interactions and the spatiotemporal dynamics of bacterial outer membrane proteins. *Curr. Opin. Struct. Biol.* 35:109–115.
76. Lomize, M. A., A. L. Lomize, ..., H. I. Mosberg. 2006. OPM: orientations of proteins in membranes database. *Bioinformatics.* 22:623–625.
77. Capponi, S., M. Heyden, ..., S. H. White. 2015. Anomalous behavior of water inside the SecY translocon. *Proc. Natl. Acad. Sci. USA.* 112:9016–9021.

**Biophysical Journal, Volume 110**

**Supplemental Information**

**BamA POTRA Domain Interacts with a Native Lipid Membrane Surface**

**Patrick J. Fleming, Dhillon S. Patel, Emilia L. Wu, Yifei Qi, Min Sun Yeom, Marcelo Carlos Sousa, Karen G. Fleming, and Wonpil Im**



## FIGURES

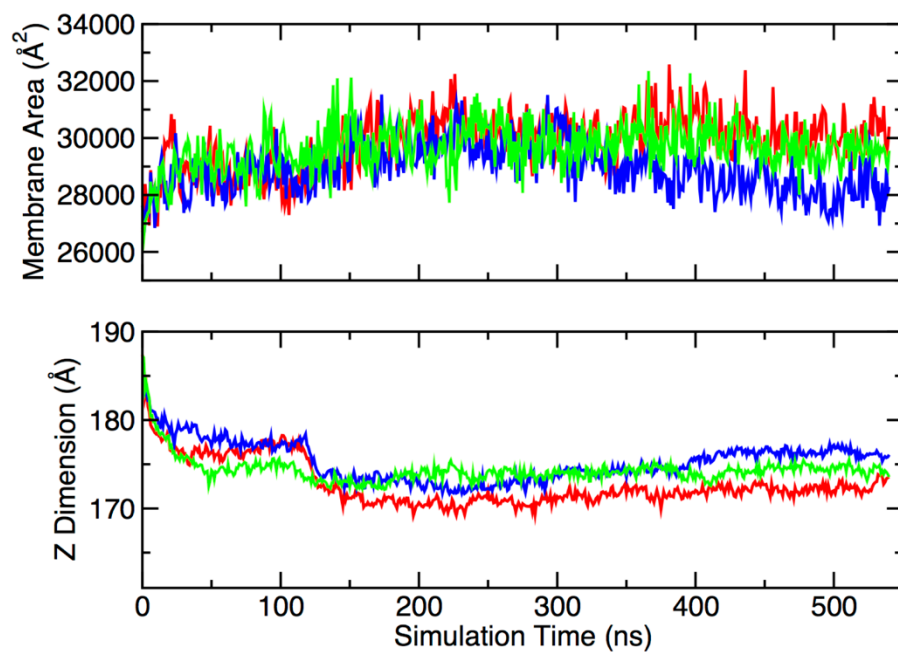

**Figure S1.** Time-series of the membrane surface areas and system z dimensions for three systems containing BamA in model *E. coli* membranes. Red, blue and green represent replicas 1, 2, 3, respectively.

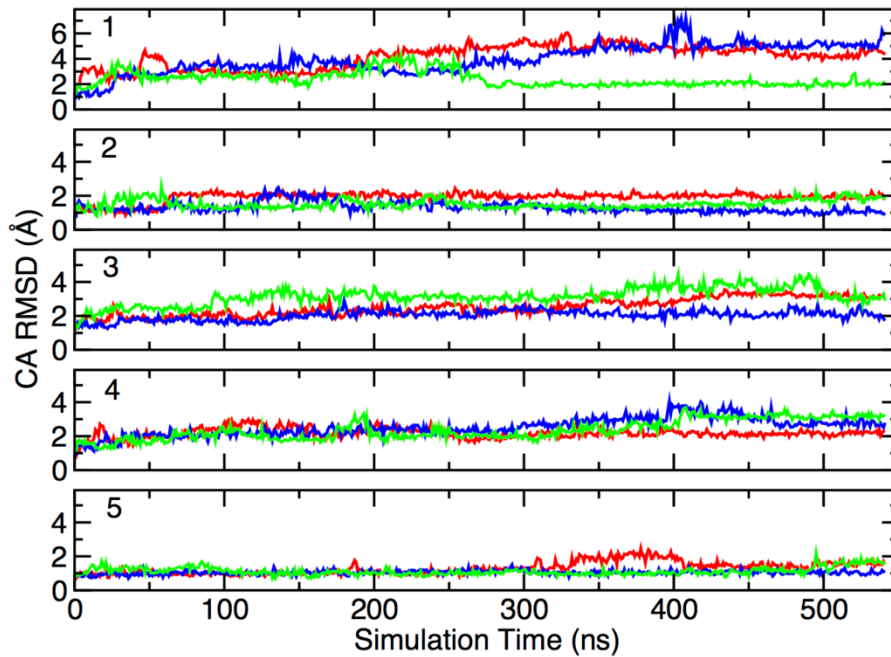

**Figure S2.** POTRA domains have variable backbone flexibility during MD simulation. The C $\alpha$  RMSD compared to crystal structures for POTRA domains 1-5 are plotted. The colors red, blue and green indicate replicas 1, 2 and 3, respectively.

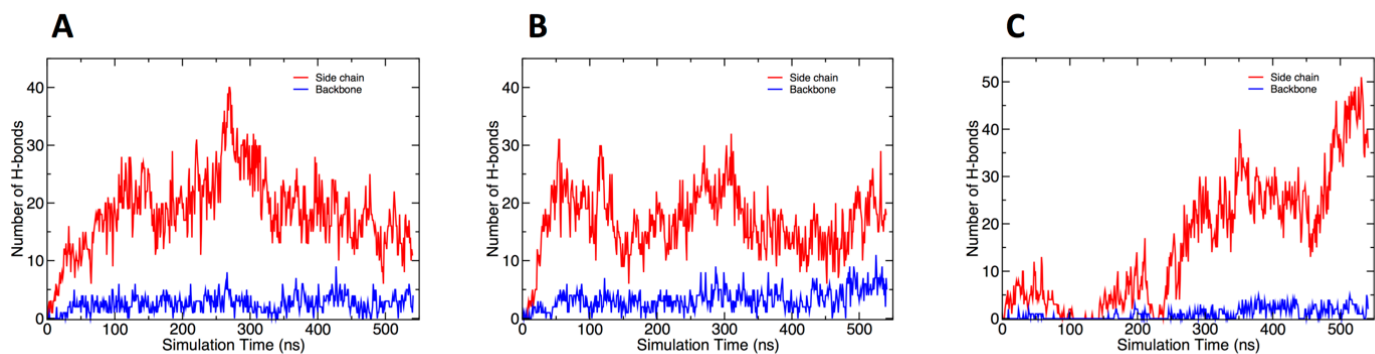

**Figure S3.** BamA POTRA domain forms many hydrogen bonds with phospholipid head groups. The total number of hydrogen bonds (heavy atom distance, 3.0 Å, maximum angle 45°) between POTRA1-4 and membrane phospholipids is plotted versus simulation time. Protein residue side chain (red) and backbone (blue) hydrogen bonds are plotted separately; data from replicas 1, 2, 3 are shown in plots A, B, C, respectively.

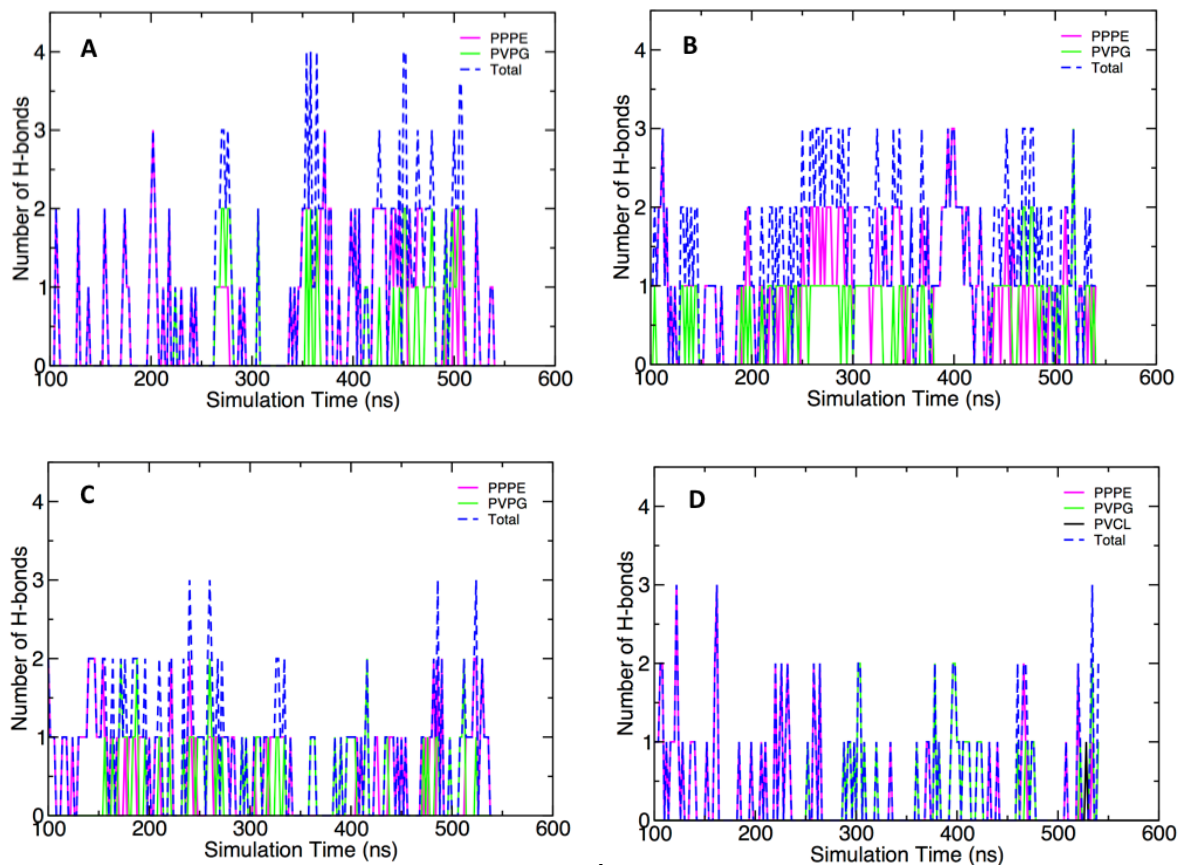

**Figure S4.** BamA hydrogen bonds to phospholipids with dynamic exchange of partners. Hydrogen bonding between amino acid side chains and phospholipids was measured using a distance cutoff of 3.0 Å, and maximum angle of 45° in full length BamA embedded in a model *E. coli* membrane. (A) BamA R64; (B) BamA K103; (C) BamA K106; (D) BamA R162. Data shown are for replica 1.



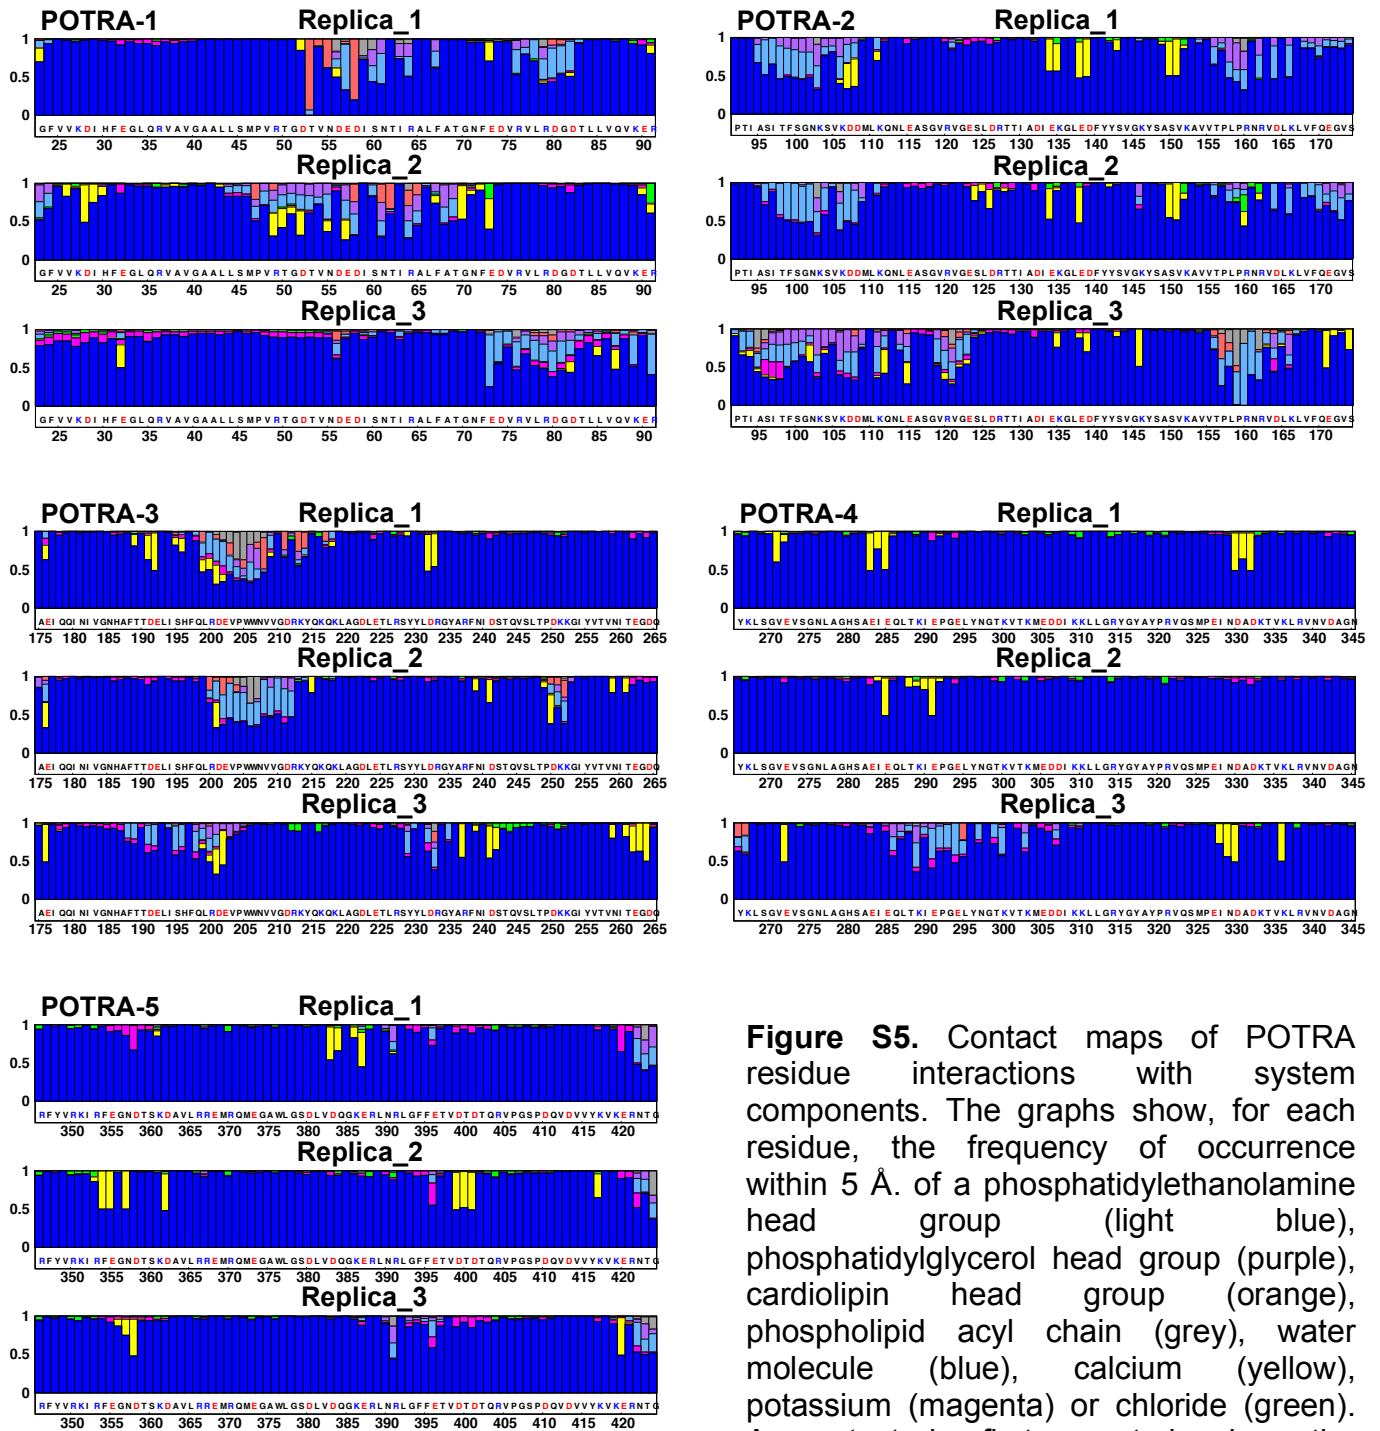

**Figure S5.** Contact maps of POTRA residue interactions with system components. The graphs show, for each residue, the frequency of occurrence within 5 Å. of a phosphatidylethanolamine head group (light blue), phosphatidylglycerol head group (purple), cardiolipin head group (orange), phospholipid acyl chain (grey), water molecule (blue), calcium (yellow), potassium (magenta) or chloride (green). A contact is first counted when the distance of between the heavy atoms of a residue and those of its interacting partner is <5 Å, and normalized for each interacting partner. The BamA amino acid sequence and residue number is below each pattern of interactions.

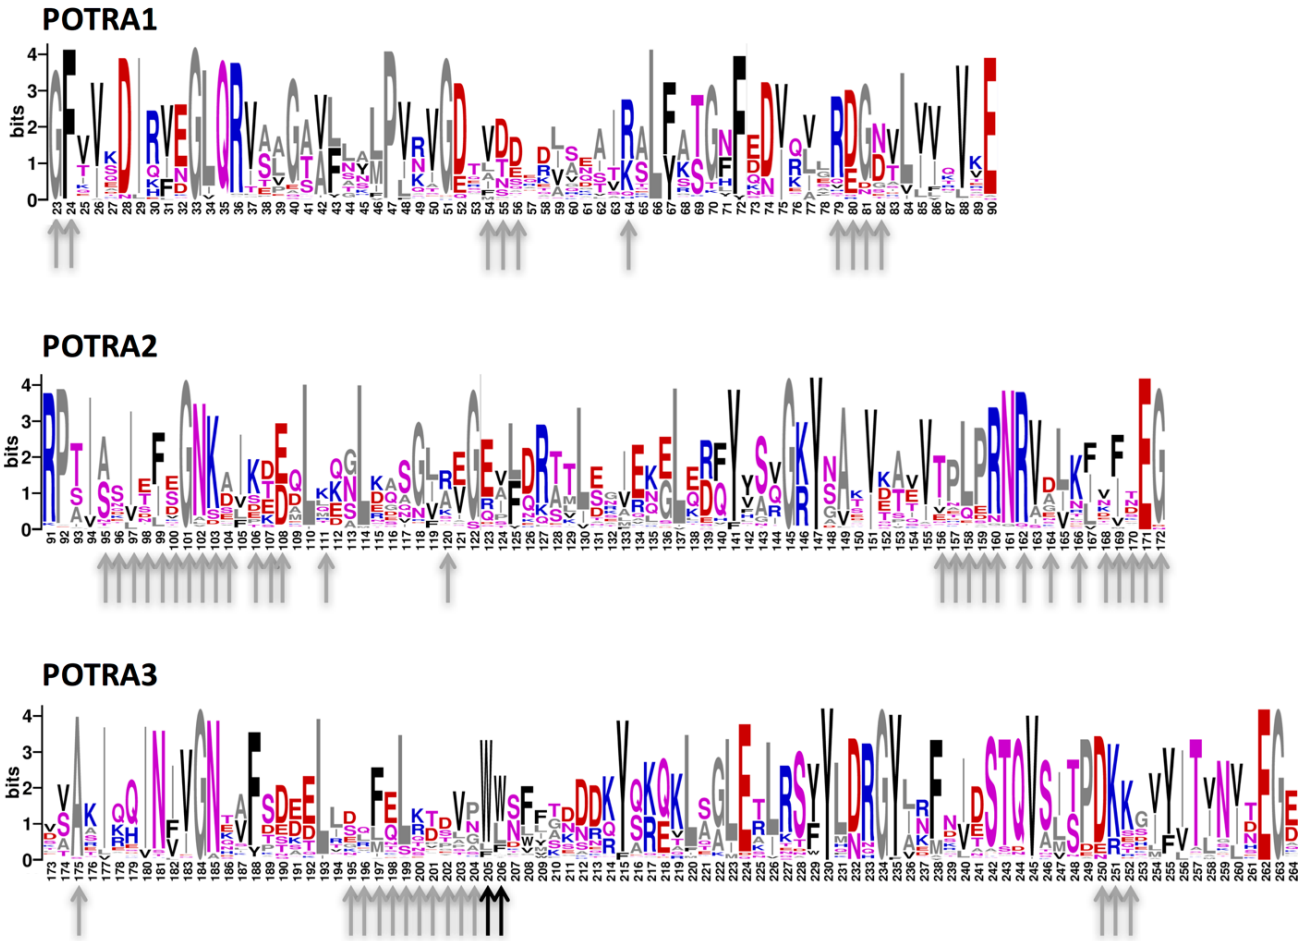

**Figure S6.** WebLogo diagram of POTRA1-3 consensus sequence. A multiple sequence alignment of 149 bacterial BamA homologs was used to generate the consensus sequence. POTRA1, 2 and 3 are shown in the top, middle, and bottom rows, respectively. Sites of significant interaction with the membrane are indicated with arrows (cf. Supp. Fig. S5); black arrows indicate conserved aromatic residues at positions 205 and 206 that insert into the membrane interfacial region.

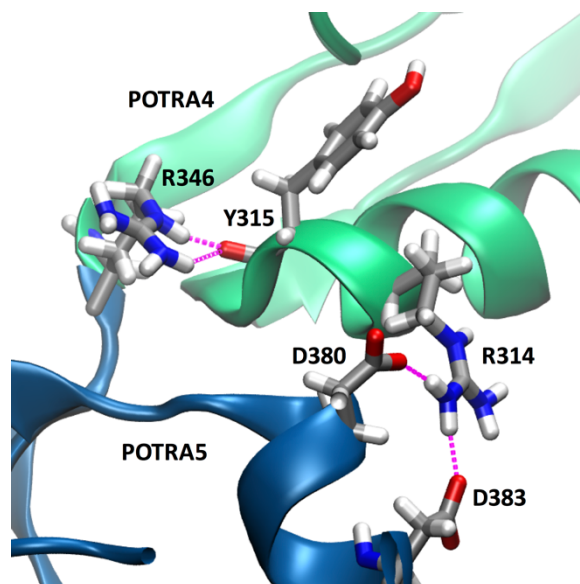

**Figure S7.** POTRA4-5 inter-motif orientation is stabilized during simulation by hydrogen bonds similar to those described for crystal structure 3OG5. Snapshot of POTRA3-4 linker region from replica 1 showing additional interaction between R314 and D380 that is occasionally observed. Compare to Figure 1 in [25].

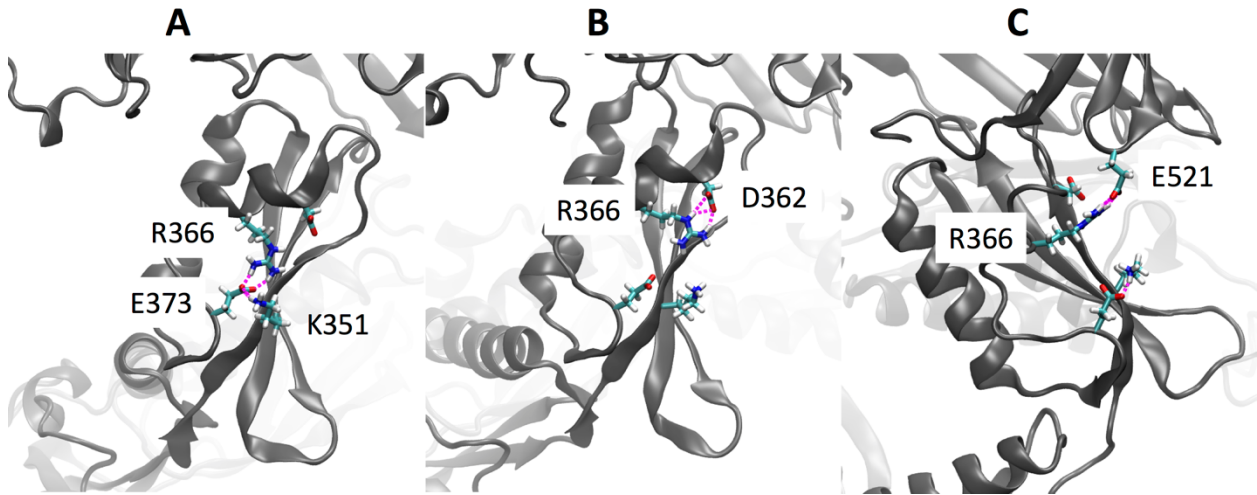

**Figure S8.** Residues in the POTRA5 core show conformational plasticity. Three separate snapshots (A,B,C) from trajectories of full length BamA embedded in a model *E. coli* membrane illustrating the dynamic electrostatic network between charged residues.



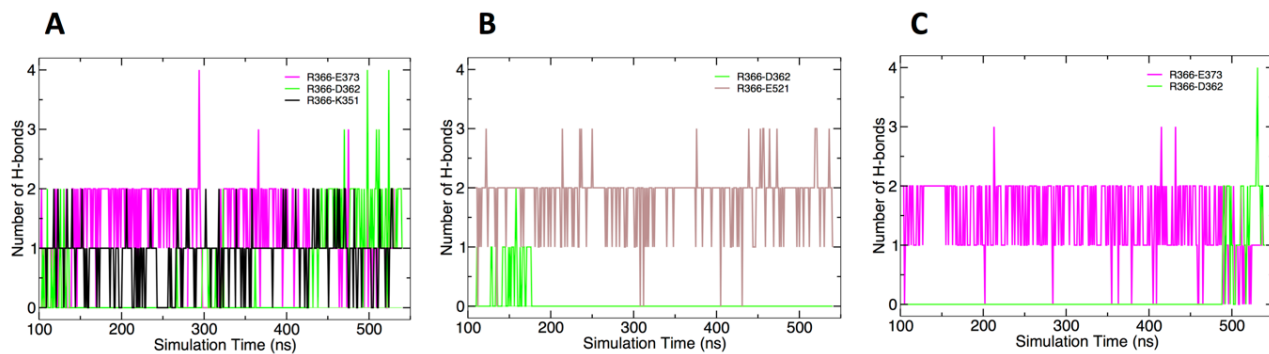

**Figure S9.** POTRA5 core residues exchange hydrogen bonding partners to create a dynamic electrostatic network. The number of, and partners for, R366 hydrogen bonding in full length BamaA embedded in LPS/PL membranes are shown. (A), replica 1; (B), replica 2; (C), replica 3.

**Front view**

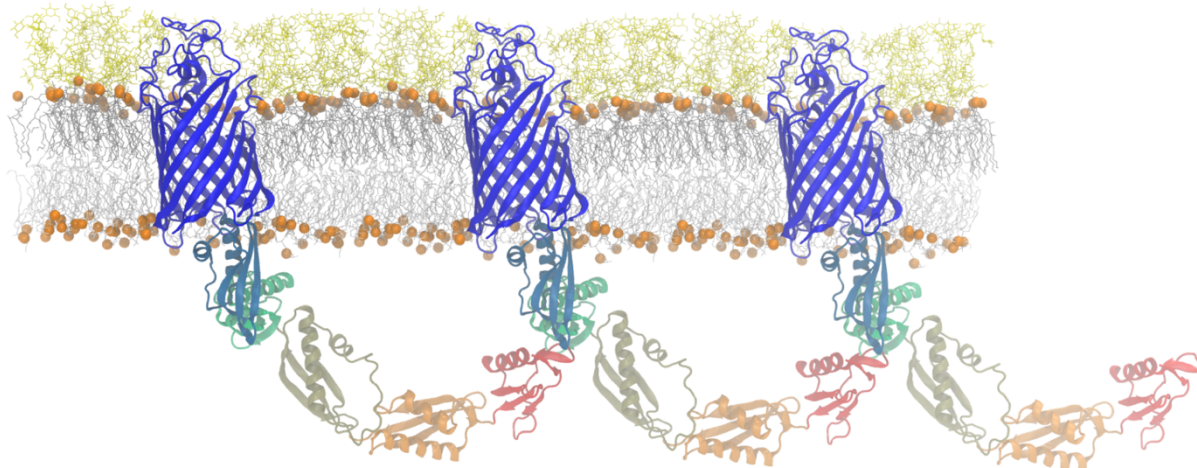

**Bottom view**

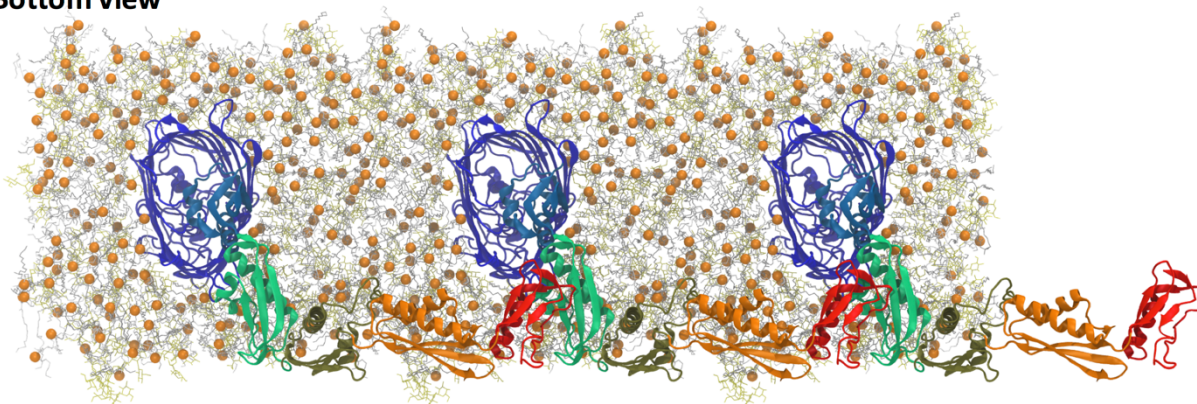

**Figure S10.** Periodic boundary image BamA contacts at small lipid to protein ratios. Two independent molecular systems with membrane surface dimensions of  $90\text{\AA} \times 90\text{\AA}$  (100 lower leaflet phospholipid:1 protein) were simulated with conventional MD. In both systems the periodic boundary protein neighbors made stable contact within 250 ns simulation time. Replica 2 shown.

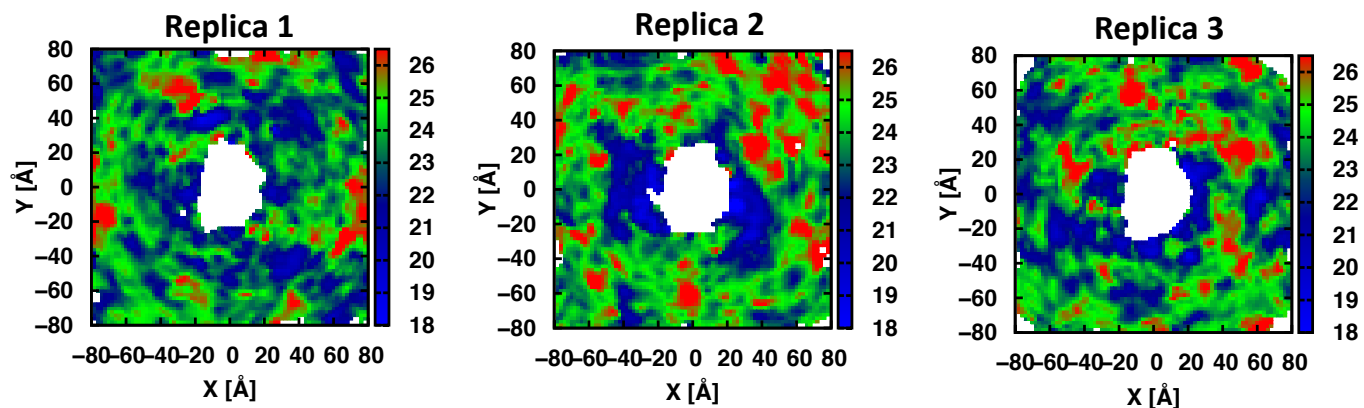

**Figure S11.** Two-dimensional z-thickness of the LPS/phospholipid membrane with embedded full-length BamA. Thickness is defined as the distance between the average of C2 and C4 atoms of lipid A (combined) and the average C2 positions of phospholipids within a 2 Å grid and represents the hydrophobic thickness. The relative orientation of the embedded BamA is the same as in Figure 6.

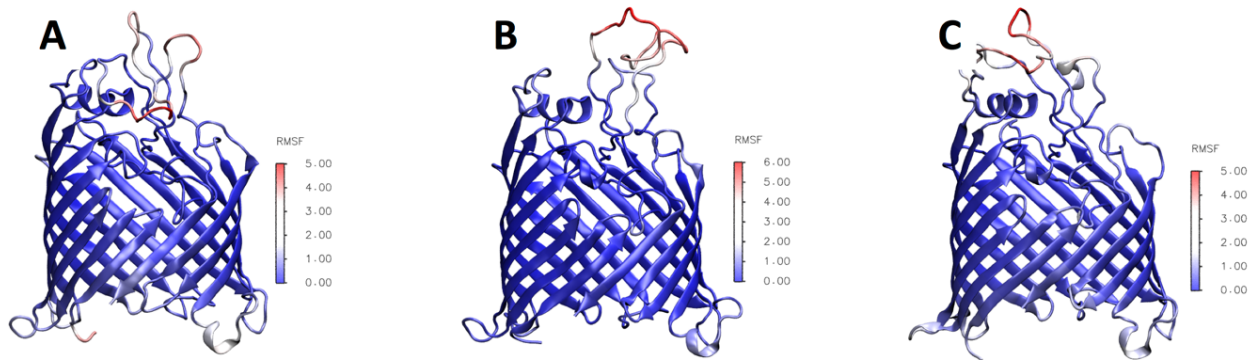

**Figure S12.** BamA  $\beta$ -barrel transmembrane strands have low RMSF in LPS/phospholipid membranes but extra-membranous loops and turns are variable. Ribbon diagrams of the  $\beta$ -barrel fragment are colored according to C $\alpha$  RMSF calculated from 100 -540 ns. (A) Strand C $\alpha$  RMSD to starting structure = 0.80 Å, total  $\beta$ -barrel C $\alpha$  RMSD = 2.41 Å; (B) Strand C $\alpha$  RMSD to starting structure = 0.93 Å, total  $\beta$ -barrel C $\alpha$  RMSD = 3.75 Å. (C) Strand C $\alpha$  RMSD to starting structure = 0.83 Å, total  $\beta$ -barrel C $\alpha$  RMSD = 2.63 Å.



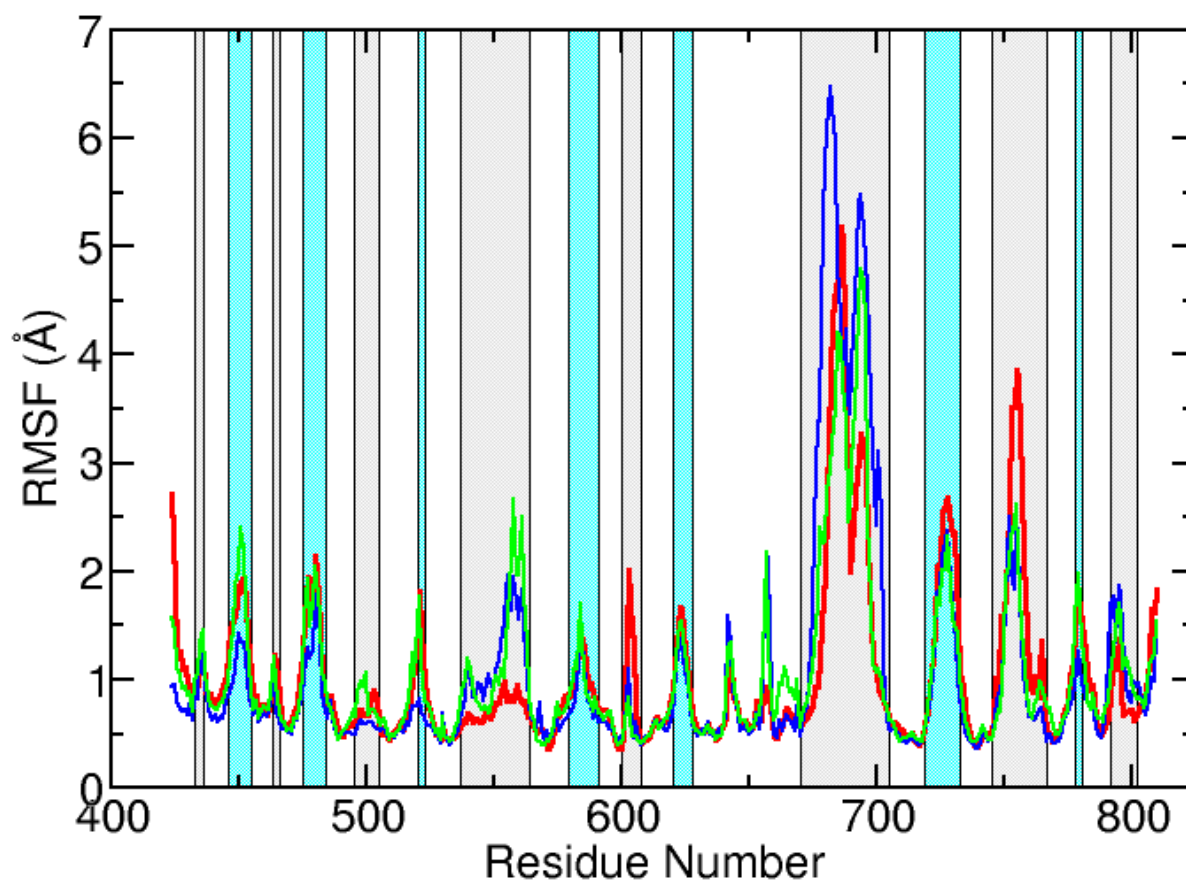

**Figure S13.** Root mean-square fluctuations (RMSF) of the BamA  $\beta$ -barrel  $C\alpha$  backbone atoms in replicas 1, 2, and 3 (red, blue, green curves) averaged over 540 ns. Protein structure is indicated by the colored bars: extracellular loops (grey) and periplasmic turns (cyan). The region between residues 640 and 709 includes the L6 loop that extends into the barrel cavity and continues into an external loop.

## Movie Legends

**Movie S1.** Replica 1 simulation. Full length BamA embedded in an LPS/phospholipid membrane; simulation time shown is 1-540 ns. Red = POTRA1, orange = POTRA2, khaki = POTRA3, green = POTRA4, light blue = POTRA5, dark blue =  $\beta$ -barrel. Membrane phosphates delimiting the hydrophobic core are shown as orange spheres; polysaccharide as dark yellow lines and other lipid as grey lines.

**Movie S2.** Replica 2 simulation. Full length BamA embedded in an LPS/phospholipid membrane; simulation time shown is 1-540 ns. Red = POTRA1, orange = POTRA2, khaki = POTRA3, green = POTRA4, light blue = POTRA5, dark blue =  $\beta$ -barrel. Membrane phosphates delimiting the hydrophobic core are shown as orange spheres; polysaccharide as dark yellow lines and other lipid as grey lines.

**Movie S3.** Replica 3 simulation. Full length BamA embedded in an LPS/phospholipid membrane; simulation time shown is 1-540 ns. The POTRA domains contact the membrane at approximately 230 ns of simulation. Red = POTRA1, orange = POTRA2, khaki = POTRA3, green = POTRA4, light blue = POTRA5, dark blue =  $\beta$ -barrel. Membrane phosphates delimiting the hydrophobic core are shown as orange spheres; polysaccharide as dark yellow lines and other lipid as grey lines.

**Movie S4.** Replica 1 positional time evolution of POTRA domain center of mass for full length BamA embedded in LPS/PL membrane. The view is looking down the membrane normal toward the phospholipid surface of the membrane. The dark blue circle represents the center of the BamA  $\beta$ -barrel. Red = POTRA1, orange = POTRA2, khaki = POTRA3, light green = POTRA4, light blue = POTRA5. Note that the drift of POTRAs 1, 2 and 3 in this x, y plane (parallel to the membrane surface) is occasionally correlated whole POTRA domain drift is not due correlated with POTRA5 movement.

**Movie S5.** Replica 2 positional time evolution of POTRA domain center of mass for full length BamA embedded in LPS/PL membrane. The view is looking down the membrane normal toward the phospholipid surface of the membrane. The dark blue circle represents the center of the BamA  $\beta$ -barrel. Red = POTRA1, orange = POTRA2, khaki = POTRA3, light green = POTRA4, light blue = POTRA5. Note that the drift of POTRAs 1, 2 and 3 in this x, y plane (parallel to the membrane surface) is occasionally correlated whole POTRA domain drift is not due correlated with POTRA5 movement.

**Movie S6.** Replica 3 positional time evolution of POTRA domain center of mass for full length BamA embedded in LPS/PL membrane. The view is looking down the membrane normal toward the phospholipid surface of the membrane. The dark blue circle represents the center of the BamA  $\beta$ -barrel. Red = POTRA1, orange = POTRA2, khaki = POTRA3, light green = POTRA4, light blue = POTRA5. Note that the drift of POTRAs 1, 2 and 3 in this x, y plane (parallel to the membrane

surface) is occasionally correlated whole POTRA domain drift is not due correlated with POTRA5 movement.

**Movie S7.** POTRA5 relative motion is due to changes in principal axis angle not rotation around POTRA5 principal axis. The  $\beta$ -barrel and POTRA5 fragments from crystal structure 4K3B (translucent blue and orange, respectively) are aligned to the same from Replica 1 simulation at time zero (translucent blue and light blue, respectively). Simulation time shown is 1-540 ns.
